# Supplementary material for: Rapid evaluation of the interaction energies for carbohydrate-containing hydrogen-bonded complexes via the polarizable dipole–dipole interaction model combined with NBO or AM1 charge
Source: Royal Society of Chemistry journal article supplement (doi:10.1039/c4ra12814a), 2014-12-17
Supplement: c4ra12814a1.pdf [file c4ra12814a1.pdf]

Supporting Information for:

# Rapid Evaluation of the Interaction Energies for Carbohydrate-Containing Hydrogen-Bonded Complexes via the Polarizable Dipole-Dipole Interaction Model Combined with NBO Charge or AM1 Charge

Jiao-Jiao Hao, Chang-Sheng Wang\*

School of Chemistry and Chemical Engineering, Liaoning Normal University, Dalian 116029, P. R. China

E-mail: chwangcs@lnnu.edu.cn

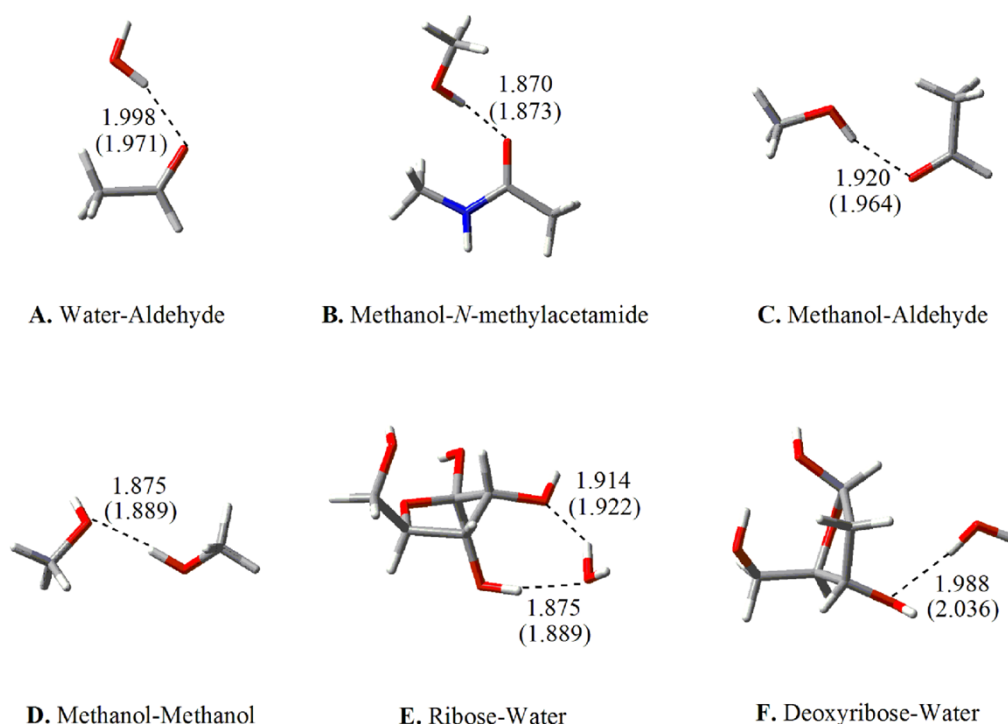

Mean unsigned error (MUE) = 0.023 Å

Root mean squared error (RMSE) = 0.028 Å

**Figure S1.** The training dimers used to derive the parameters needed in this work. The equilibrium hydrogen bond distances predicted by eq (1) are given in the corresponding position. Values in parentheses are obtained from MP2/6-31+G(d,p) calculations. All distances are in Å.

**Table S1.** The interaction energies obtained by the CP-corrected MP2/aug-cc-pVTZ method ( $IE_{MP2}$ ), and by eq (2) with NBO charge ( $IE$ ) for the six training dimers.

| Dimers                         | $IE_{MP2}$ | eq (2) with NBO charge |           |           |                |       |       | $\Delta E$ | $\delta(\%)$ |
|--------------------------------|------------|------------------------|-----------|-----------|----------------|-------|-------|------------|--------------|
|                                |            | $E_{dd}^{perm}$        | $E_{pol}$ | $E_{vdw}$ | $\Delta_{mix}$ | $IE$  |       |            |              |
| <b>A</b>                       | -6.11      | -3.94                  | -0.60     | -0.22     | -1.32          | -6.08 | 0.03  | 0.4        |              |
| <b>B</b>                       | -8.12      | -4.95                  | -0.53     | -0.52     | -2.11          | -8.11 | 0.01  | 0.1        |              |
| <b>C</b>                       | -6.25      | -4.41                  | -0.47     | -0.29     | -1.13          | -6.30 | -0.05 | 0.9        |              |
| <b>D</b>                       | -5.63      | -3.29                  | -0.29     | -0.20     | -1.47          | -5.25 | 0.38  | 6.8        |              |
| <b>E</b>                       | -9.10      | -5.91                  | -0.91     | 0.41      | -2.64          | -9.05 | 0.05  | 0.6        |              |
| <b>F</b>                       | -6.02      | -3.54                  | -0.53     | -0.74     | -0.77          | -5.58 | 0.44  | 7.4        |              |
| Mean unsigned error (MUE)      |            |                        |           |           |                |       | 0.16  |            |              |
| Root mean squared error (RMSE) |            |                        |           |           |                |       | 0.24  |            |              |
| Mean relative error (MRE)      |            |                        |           |           |                |       |       | 2.7        |              |

$\Delta E = IE - IE_{MP2}$ ,  $\delta = |\Delta E \div IE_{MP2}| \times 100\%$ , All energies are in kcal/mol.

**Table S2.** The equilibrium hydrogen bond distances  $R_{eq}(H\cdots O)$  obtained by MP2/6-31+G(d,p), by eq (1) and by eq (2).

| Dimer                          | MP2   | Eq (1) | $\Delta R$ | eq (2)<br>with NBO charge | $\Delta R$ | eq (2)<br>with AM1 charge | $\Delta R$ |
|--------------------------------|-------|--------|------------|---------------------------|------------|---------------------------|------------|
| <b>1</b>                       | 2.061 | 2.072  | 0.011      | 2.050                     | -0.011     | 2.050                     | -0.011     |
|                                | 1.979 | 1.987  | 0.008      | 1.971                     | -0.008     | 1.971                     | -0.008     |
| <b>2</b>                       | 2.076 | 2.088  | 0.012      | 2.065                     | -0.011     | 2.070                     | -0.006     |
|                                | 1.967 | 1.975  | 0.008      | 1.959                     | -0.008     | 1.962                     | -0.005     |
| <b>3</b>                       | 1.865 | 1.882  | 0.017      | 1.855                     | -0.010     | 1.860                     | -0.005     |
| <b>4</b>                       | 1.881 | 1.855  | -0.026     | 1.835                     | -0.046     | 1.840                     | -0.041     |
| <b>5</b>                       | 1.859 | 1.900  | 0.041      | 1.880                     | 0.021      | 1.890                     | 0.031      |
|                                | 1.796 | 1.836  | 0.040      | 1.816                     | 0.020      | 1.826                     | 0.030      |
| <b>6</b>                       | 1.870 | 1.910  | 0.040      | 1.890                     | 0.020      | 1.895                     | 0.025      |
|                                | 1.792 | 1.830  | 0.038      | 1.811                     | 0.019      | 1.816                     | 0.024      |
| <b>7</b>                       | 1.800 | 1.840  | 0.040      | 1.820                     | 0.020      | 1.825                     | 0.025      |
|                                | 1.989 | 2.026  | 0.037      | 2.007                     | 0.018      | 2.012                     | 0.023      |
| <b>8</b>                       | 1.850 | 1.857  | 0.007      | 1.840                     | -0.010     | 1.840                     | -0.010     |
|                                | 1.910 | 1.914  | 0.004      | 1.899                     | -0.011     | 1.899                     | -0.011     |
| <b>9</b>                       | 1.846 | 1.835  | -0.011     | 1.820                     | -0.026     | 1.810                     | -0.036     |
| <b>10</b>                      | 1.872 | 1.897  | 0.025      | 1.884                     | 0.012      | 1.884                     | 0.012      |
|                                | 1.842 | 1.880  | 0.038      | 1.860                     | 0.018      | 1.860                     | 0.018      |
| <b>11</b>                      | 1.877 | 1.900  | 0.023      | 1.888                     | 0.011      | 1.894                     | 0.017      |
|                                | 1.833 | 1.870  | 0.037      | 1.850                     | 0.017      | 1.860                     | 0.027      |
| <b>12</b>                      | 1.770 | 1.800  | 0.030      | 1.770                     | 0.000      | 1.780                     | 0.010      |
|                                | 1.921 | 1.950  | 0.029      | 1.921                     | 0.000      | 1.931                     | 0.010      |
| <b>13</b>                      | 1.871 | 1.880  | 0.009      | 1.860                     | -0.011     | 1.865                     | -0.006     |
|                                | 1.884 | 1.890  | 0.006      | 1.879                     | -0.005     | 1.881                     | -0.003     |
| <b>14</b>                      | 1.918 | 1.925  | 0.007      | 1.918                     | 0.000      | 1.918                     | 0.000      |
|                                | 1.918 | 1.925  | 0.007      | 1.918                     | 0.000      | 1.918                     | 0.000      |
| <b>15</b>                      | 1.804 | 1.818  | 0.014      | 1.804                     | 0.000      | 1.804                     | 0.000      |
|                                | 1.841 | 1.865  | 0.024      | 1.841                     | 0.000      | 1.841                     | 0.000      |
| <b>16</b>                      | 1.838 | 1.887  | 0.049      | 1.865                     | 0.027      | 1.870                     | 0.032      |
| <b>17</b>                      | 1.812 | 1.845  | 0.033      | 1.820                     | 0.008      | 1.830                     | 0.018      |
|                                | 1.927 | 1.939  | 0.012      | 1.930                     | 0.003      | 1.934                     | 0.007      |
|                                | 2.165 | 2.191  | 0.026      | 2.171                     | 0.006      | 2.179                     | 0.014      |
| <b>18</b>                      | 1.825 | 1.875  | 0.050      | 1.855                     | 0.030      | 1.855                     | 0.030      |
|                                | 1.788 | 1.833  | 0.045      | 1.815                     | 0.027      | 1.815                     | 0.027      |
| <b>19</b>                      | 1.828 | 1.875  | 0.047      | 1.855                     | 0.027      | 1.860                     | 0.032      |
|                                | 1.793 | 1.832  | 0.039      | 1.816                     | 0.023      | 1.820                     | 0.027      |
| <b>20</b>                      | 1.913 | 1.932  | 0.019      | 1.900                     | -0.013     | 1.913                     | 0.000      |
|                                | 1.806 | 1.815  | 0.009      | 1.800                     | -0.006     | 1.806                     | 0.000      |
| Mean unsigned error (MUE)      |       |        | 0.025      |                           | 0.014      |                           | 0.016      |
| Root mean squared error (RMSE) |       |        | 0.029      |                           | 0.017      |                           | 0.020      |

All distances are in Å.

**Table S3.** The equilibrium hydrogen bond distances  $R_{eq}(\text{H}\cdots\text{O})$  obtained by B3LYP/6-31+G(d,p), by eq (1) and by eq (2).

| Dimer                          | B3LYP | Eq (1) | $\Delta R$ | eq (2)<br>with NBO charge | $\Delta R$ | eq (2)<br>with AM1 charge | $\Delta R$ |
|--------------------------------|-------|--------|------------|---------------------------|------------|---------------------------|------------|
| <b>21</b>                      | 1.822 | 1.828  | 0.006      | 1.815                     | -0.007     | 1.810                     | -0.012     |
|                                | 1.969 | 1.972  | 0.003      | 1.966                     | -0.003     | 1.963                     | -0.006     |
| <b>22</b>                      | 1.824 | 1.812  | -0.012     | 1.812                     | -0.012     | 1.800                     | -0.024     |
|                                | 1.966 | 1.957  | -0.009     | 1.957                     | -0.009     | 1.948                     | -0.018     |
| <b>23</b>                      | 1.901 | 1.883  | -0.018     | 1.882                     | -0.019     | 1.877                     | -0.024     |
|                                | 1.973 | 1.958  | -0.015     | 1.956                     | -0.017     | 1.950                     | -0.023     |
|                                | 2.020 | 2.012  | -0.008     | 2.011                     | -0.009     | 2.009                     | -0.011     |
| <b>24</b>                      | 1.820 | 1.820  | 0.000      | 1.800                     | -0.020     | 1.810                     | -0.010     |
|                                | 1.901 | 1.902  | 0.001      | 1.892                     | -0.009     | 1.897                     | -0.004     |
| <b>25</b>                      | 1.882 | 1.876  | -0.006     | 1.864                     | -0.018     | 1.864                     | -0.018     |
|                                | 1.817 | 1.810  | -0.007     | 1.790                     | -0.027     | 1.790                     | -0.027     |
| <b>26</b>                      | 2.066 | 2.036  | -0.030     | 2.036                     | -0.030     | 2.033                     | -0.033     |
|                                | 1.787 | 1.740  | -0.047     | 1.740                     | -0.047     | 1.735                     | -0.052     |
|                                | 1.930 | 1.887  | -0.043     | 1.887                     | -0.043     | 1.882                     | -0.048     |
| Mean unsigned error (MUE)      |       |        | 0.015      |                           | 0.019      |                           | 0.022      |
| Root mean squared error (RMSE) |       |        | 0.021      |                           | 0.023      |                           | 0.026      |

All distances are in Å.

The data in Table S2 and Table S3 indicate that both eq (1) and eq (2) can produce accurate equilibrium hydrogen bond distances. But eq (1) is more efficient than eq (2) and that is the reason why we use eq (1) to produce equilibrium hydrogen bond distances.

**Table S4.** The interaction energy components obtained by eq (2) with NBO charge

|    | $E_{dd}^{perm}$ | $E_{pol}$    | $E_{vdw}$    | $\Delta_{mix}$ | $IE$   |
|----|-----------------|--------------|--------------|----------------|--------|
| 1  | -5.75(55.5%)    | -0.75(7.3%)  | -2.43(23.5%) | -1.42(13.7%)   | -10.35 |
| 2  | -5.77(56.1%)    | -0.75(7.3%)  | -2.33(22.7%) | -1.43(13.9%)   | -10.28 |
| 3  | -4.82(50.4%)    | -0.98(10.3%) | -1.74(18.2%) | -2.02(21.1%)   | -9.56  |
| 4  | -4.84(52.3%)    | -0.84(9.1%)  | -1.34(14.5%) | -2.24(24.1%)   | -9.26  |
| 5  | -7.31(51.3%)    | -0.88(6.2%)  | -1.34(9.4%)  | -4.73(33.1%)   | -14.26 |
| 6  | -7.46(51.1%)    | -0.9(6.2%)   | -1.36(9.3%)  | -4.88(33.4%)   | -14.60 |
| 7  | -11.50(63.2%)   | -1.43(7.8%)  | -2.64(14.5%) | -2.63(14.5%)   | -18.20 |
| 8  | -5.73(61.0%)    | -0.64(6.9%)  | -0.22(2.3%)  | -2.80(29.8%)   | -9.39  |
| 9  | -7.02(54.7%)    | -1.46(11.3%) | -1.95(15.2%) | -2.41(18.8%)   | -12.84 |
| 10 | -6.70(51.6%)    | -0.93(7.2%)  | -1.81(13.9%) | -3.55(27.3%)   | -12.99 |
| 11 | -6.82(51.4%)    | -0.96(7.2%)  | -1.74(13.1%) | -3.75(28.3%)   | -13.27 |
| 12 | -11.59(57.7%)   | -2.40(11.9%) | -2.67(13.3%) | -3.43(17.1%)   | -20.09 |
| 13 | -5.18(58.1%)    | -0.56(6.2%)  | -0.41(4.6%)  | -2.77(31.1%)   | -8.92  |
| 14 | -2.80(37.9%)    | -0.49(6.6%)  | -1.90(25.7%) | -2.20(29.8%)   | -7.39  |
| 15 | -5.88(47.9%)    | -0.95(7.7%)  | -1.85(15.1%) | -3.59(29.3%)   | -12.27 |
| 16 | -4.74(51.4%)    | -0.79(8.6%)  | -1.72(18.6%) | -1.98(21.5%)   | -9.23  |
| 17 | -14.18(59.2%)   | -2.18(9.1%)  | -3.63(15.1%) | -3.99(16.6%)   | -23.98 |
| 18 | -7.87(57.0%)    | -1.06(7.7%)  | -1.27(9.2%)  | -3.61(26.1%)   | -13.81 |
| 19 | -8.01(57.7%)    | -1.03(7.4%)  | -1.23(8.8%)  | -3.62(26.1%)   | -13.89 |
| 20 | -5.88(58.5%)    | -0.80(8.0%)  | -0.23(2.3%)  | -3.13(31.2%)   | -10.04 |
| 21 | -5.51(57.7%)    | -0.32(3.4%)  | -0.94(9.9%)  | -2.76(29.0%)   | -9.53  |
| 22 | -5.04(52.5%)    | -0.03(0.3%)  | -1.51(15.7%) | -3.02(31.5%)   | -9.60  |
| 23 | -5.55(53.5%)    | -0.13(1.3%)  | -1.40(13.5%) | -3.30(31.7%)   | -10.38 |
| 24 | -6.70(55.5%)    | -0.88(7.3%)  | -1.23(10.2%) | -3.27(27.0%)   | -12.08 |
| 25 | -6.93(54.6%)    | -0.81(6.4%)  | -1.36(10.7%) | -3.59(28.3%)   | -12.69 |
| 26 | -10.01(50.1%)   | -0.27(1.4%)  | -4.56(22.8%) | -5.13(25.7%)   | -19.97 |

All energies are in kcal/mol.

**Table S5.** The interaction energy components obtained by eq (2) with AM1 charge

|           | $E_{dd}^{perm}$ | $E_{pol}$    | $E_{vdw}$    | $\Delta_{mix}$ | $IE$   |
|-----------|-----------------|--------------|--------------|----------------|--------|
| <b>1</b>  | -5.75(54.6%)    | -0.93(8.8%)  | -2.43(23.1%) | -1.42(13.5%)   | -10.53 |
| <b>2</b>  | -5.77(55.1%)    | -0.93(8.9%)  | -2.33(22.3%) | -1.43(13.7%)   | -10.46 |
| <b>3</b>  | -4.82(50.4%)    | -0.98(10.3%) | -1.74(18.2%) | -2.02(21.1%)   | -9.56  |
| <b>4</b>  | -4.84(52.0%)    | -0.89(9.5%)  | -1.34(14.4%) | -2.24(24.1%)   | -9.31  |
| <b>5</b>  | -7.31(50.8%)    | -1.01(7.0%)  | -1.34(9.3%)  | -4.73(32.9%)   | -14.39 |
| <b>6</b>  | -7.46(50.7%)    | -1.01(6.9%)  | -1.36(9.2%)  | -4.88(33.2%)   | -14.71 |
| <b>7</b>  | -11.50(63.0%)   | -1.49(8.2%)  | -2.64(14.5%) | -2.63(14.3%)   | -18.26 |
| <b>8</b>  | -5.73(60.5%)    | -0.72(7.6%)  | -0.22(2.3%)  | -2.80(29.6%)   | -9.47  |
| <b>9</b>  | -7.02(53.8%)    | -1.67(12.8%) | -1.95(14.9%) | -2.41(18.5%)   | -13.05 |
| <b>10</b> | -6.70(51.0%)    | -1.08(8.2%)  | -1.81(13.8%) | -3.55(27.0%)   | -13.14 |
| <b>11</b> | -6.82(50.8%)    | -1.13(8.4%)  | -1.74(12.9%) | -3.75(27.9%)   | -13.44 |
| <b>12</b> | -11.59(56.5%)   | -2.84(13.8%) | -2.67(13.0%) | -3.43(16.7%)   | -20.53 |
| <b>13</b> | -5.18(57.4%)    | -0.67(7.4%)  | -0.41(4.5%)  | -2.77(30.7%)   | -9.03  |
| <b>14</b> | -2.80(38.0%)    | -0.47(6.4%)  | -1.90(25.8%) | -2.20(29.8%)   | -7.37  |
| <b>15</b> | -5.88(46.9%)    | -1.21(9.7%)  | -1.85(14.8%) | -3.59(28.6%)   | -12.53 |
| <b>16</b> | -4.74(51.5%)    | -0.77(8.4%)  | -1.72(18.6%) | -1.98(21.5%)   | -9.21  |
| <b>17</b> | -14.18(58.4%)   | -2.51(10.3%) | -3.63(14.9%) | -3.99(16.4%)   | -24.31 |
| <b>18</b> | -7.87(56.2%)    | -1.26(9.0%)  | -1.27(9.1%)  | -3.61(25.7%)   | -14.01 |
| <b>19</b> | -8.01(56.9%)    | -1.22(8.7%)  | -1.23(8.7%)  | -3.62(25.7%)   | -14.08 |
| <b>20</b> | -5.88(58.0%)    | -0.90(8.9%)  | -0.23(2.3%)  | -3.13(30.8%)   | -10.14 |
| <b>21</b> | -5.51(54.9%)    | -0.82(8.2%)  | -0.94(9.4%)  | -2.76(27.5%)   | -10.03 |
| <b>22</b> | -5.04(50.5%)    | -0.41(4.1%)  | -1.51(15.1%) | -3.02(30.3%)   | -9.98  |
| <b>23</b> | -5.55(51.9%)    | -0.45(4.2%)  | -1.40(13.1%) | -3.30(30.8%)   | -10.70 |
| <b>24</b> | -6.70(54.7%)    | -1.05(8.6%)  | -1.23(10.0%) | -3.27(26.7%)   | -12.25 |
| <b>25</b> | -6.93(53.8%)    | -1.01(7.8%)  | -1.36(10.6%) | -3.59(27.8%)   | -12.89 |
| <b>26</b> | -10.01(48.2%)   | -1.08(5.2%)  | -4.56(21.9%) | -5.13(24.7%)   | -20.78 |

All energies are in kcal/mol.

**Table S6.** Cartesian coordinates for all the hydrogen-bonded complexes considered in this work

| A. Water-Aldehyde |             |                         |           |           |
|-------------------|-------------|-------------------------|-----------|-----------|
| Atomic Number     | Atomic Type | Coordinates (Angstroms) |           |           |
|                   |             | X                       | Y         | Z         |
| 6                 | 0           | -1.237812               | -0.407194 | 0.003609  |
| 8                 | 0           | -0.293446               | -1.196535 | -0.003116 |
| 6                 | 0           | -1.105946               | 1.083696  | -0.005309 |
| 1                 | 0           | -2.265622               | -0.804984 | 0.018152  |
| 1                 | 0           | -1.639937               | 1.481410  | -0.870291 |
| 1                 | 0           | -0.063319               | 1.388039  | -0.032520 |
| 1                 | 0           | -1.594014               | 1.486760  | 0.884113  |
| 8                 | 0           | 2.180690                | 0.310518  | 0.014840  |
| 1                 | 0           | 3.026066                | -0.138974 | -0.084483 |
| 1                 | 0           | 1.501421                | -0.383133 | 0.001438  |

  

| B. Methanol- <i>N</i> -methylacetamide |             |                         |           |           |
|----------------------------------------|-------------|-------------------------|-----------|-----------|
| Atomic Number                          | Atomic Type | Coordinates (Angstroms) |           |           |
|                                        |             | X                       | Y         | Z         |
| 6                                      | 0           | 0.560965                | 1.935711  | 0.096049  |
| 7                                      | 0           | 1.557952                | 0.905305  | -0.167646 |
| 6                                      | 0           | 1.317749                | -0.404043 | 0.085876  |
| 6                                      | 0           | 2.434021                | -1.372520 | -0.225834 |
| 8                                      | 0           | 0.238699                | -0.798129 | 0.565315  |
| 1                                      | 0           | -0.281595               | 1.859562  | -0.588497 |
| 1                                      | 0           | 0.187765                | 1.829621  | 1.112407  |
| 1                                      | 0           | 1.038749                | 2.905532  | -0.013564 |
| 1                                      | 0           | 2.435162                | 1.163528  | -0.588554 |
| 1                                      | 0           | 3.323298                | -0.886566 | -0.623733 |
| 1                                      | 0           | 2.693459                | -1.904606 | 0.687354  |
| 1                                      | 0           | 2.069117                | -2.101628 | -0.946728 |
| 6                                      | 0           | -3.302956               | -0.632845 | -0.131471 |
| 8                                      | 0           | -2.265528               | 0.341934  | -0.137881 |
| 1                                      | 0           | -4.199469               | -0.143884 | -0.504844 |
| 1                                      | 0           | -3.501403               | -1.006940 | 0.875892  |
| 1                                      | 0           | -3.067563               | -1.479022 | -0.781820 |
| 1                                      | 0           | -1.447234               | -0.080981 | 0.178416  |

  

| C. Methanol-Aldehyde |             |                         |           |           |
|----------------------|-------------|-------------------------|-----------|-----------|
| Atomic Number        | Atomic Type | Coordinates (Angstroms) |           |           |
|                      |             | X                       | Y         | Z         |
| 6                    | 0           | -1.903374               | -0.454773 | 0.003831  |
| 8                    | 0           | -0.913385               | -1.186240 | -0.007238 |
| 6                    | 0           | -1.860556               | 1.041345  | 0.017295  |
| 1                    | 0           | -2.905606               | -0.913662 | 0.003807  |
| 1                    | 0           | -2.392975               | 1.418367  | -0.858152 |

|   |   |           |           |           |
|---|---|-----------|-----------|-----------|
| 1 | 0 | -0.837343 | 1.407692  | 0.022140  |
| 1 | 0 | -2.396988 | 1.402953  | 0.896703  |
| 6 | 0 | 2.768020  | -0.065350 | 0.035105  |
| 8 | 0 | 1.455648  | 0.482218  | -0.060000 |
| 1 | 0 | 3.458983  | 0.773235  | 0.020210  |
| 1 | 0 | 2.994293  | -0.721981 | -0.808044 |
| 1 | 0 | 2.908276  | -0.620021 | 0.965694  |
| 1 | 0 | 0.808716  | -0.241741 | -0.041834 |

#### D. Methanol- Methanol

| Atomic<br>Number | Atomic<br>Type | Coordinates (Angstroms) |           |           |
|------------------|----------------|-------------------------|-----------|-----------|
|                  |                | X                       | Y         | Z         |
| 6                | 0              | 2.270513                | 0.172713  | 0.327402  |
| 8                | 0              | 1.311475                | -0.497339 | -0.483098 |
| 6                | 0              | 3.206656                | -0.369691 | 0.222372  |
| 1                | 0              | 1.982922                | 0.173708  | 1.381919  |
| 1                | 0              | 2.427052                | 1.205241  | 0.004608  |
| 1                | 0              | 0.459668                | -0.040270 | -0.385551 |
| 1                | 0              | -2.186686               | -0.402436 | 0.230758  |
| 6                | 0              | -1.275633               | 0.654209  | -0.110905 |
| 8                | 0              | -1.699608               | -0.976149 | 1.012459  |
| 6                | 0              | -2.377922               | -1.052768 | -0.622781 |
| 1                | 0              | -3.126134               | -0.000171 | 0.609580  |
| 1                | 0              | -1.662331               | 1.183478  | -0.819537 |
| 1                | 0              | 2.270513                | 0.172713  | 0.327402  |
| 1                | 0              | 1.311475                | -0.497339 | -0.483098 |

#### E. Ribose-Water

| Atomic<br>Number | Atomic<br>Type | Coordinates (Angstroms) |           |           |
|------------------|----------------|-------------------------|-----------|-----------|
|                  |                | X                       | Y         | Z         |
| 8                | 0              | -2.239723               | -1.024403 | 1.416985  |
| 6                | 0              | -2.095142               | -1.618852 | 0.128257  |
| 6                | 0              | -1.061428               | -0.894179 | -0.710247 |
| 8                | 0              | -1.524228               | 0.479648  | -0.850671 |
| 6                | 0              | -0.447628               | 1.360105  | -0.529577 |
| 6                | 0              | 0.351357                | -0.823444 | -0.107467 |
| 6                | 0              | 0.364864                | 0.581964  | 0.485627  |
| 8                | 0              | 1.681717                | 1.094347  | 0.682224  |
| 8                | 0              | 1.260395                | -0.967910 | -1.188630 |
| 8                | 0              | -0.933113               | 2.530984  | 0.075155  |
| 1                | 0              | -2.561231               | -0.123202 | 1.262300  |
| 1                | 0              | -3.048653               | -1.622998 | -0.408522 |
| 1                | 0              | -1.785380               | -2.650820 | 0.294403  |
| 1                | 0              | -0.985949               | -1.352276 | -1.700177 |
| 1                | 0              | 0.135731                | 1.590081  | -1.427573 |
| 1                | 0              | 0.506917                | -1.591498 | 0.656063  |



|   |   |           |           |           |
|---|---|-----------|-----------|-----------|
| 1 | 0 | -0.193838 | 0.579634  | 1.426017  |
| 1 | 0 | 1.592294  | 2.009070  | 0.987510  |
| 1 | 0 | 2.164609  | -1.019671 | -0.824718 |
| 1 | 0 | -1.354584 | 3.078644  | -0.601638 |
| 8 | 0 | 3.695359  | -0.766753 | 0.253171  |
| 1 | 0 | 3.259276  | -0.003059 | 0.667202  |
| 1 | 0 | 4.075414  | -1.294770 | 0.963695  |

#### F. Water-Deoxyribose

| Atomic Number | Atomic Type | Coordinates (Angstroms) |           |           |
|---------------|-------------|-------------------------|-----------|-----------|
|               |             | X                       | Y         | Z         |
| 8             | 0           | -2.575927               | -0.309374 | 0.571820  |
| 6             | 0           | -2.056198               | -1.030913 | -0.539767 |
| 6             | 0           | -0.551562               | -0.886513 | -0.707050 |
| 8             | 0           | -0.185731               | 0.425306  | -1.190343 |
| 6             | 0           | 0.069412                | 1.284610  | -0.088827 |
| 6             | 0           | 0.235185                | -1.037555 | 0.589523  |
| 6             | 0           | 0.343676                | 0.392752  | 1.124929  |
| 8             | 0           | 1.523904                | -1.574722 | 0.221781  |
| 8             | 0           | -1.074961               | 2.089848  | 0.214383  |
| 1             | 0           | -2.383123               | 0.634650  | 0.432402  |
| 1             | 0           | -2.536651               | -0.727840 | -1.475721 |
| 1             | 0           | -2.293253               | -2.080100 | -0.354771 |
| 1             | 0           | -0.198750               | -1.598410 | -1.456164 |
| 1             | 0           | 0.900186                | 1.925430  | -0.382226 |
| 1             | 0           | -0.262273               | -1.710504 | 1.291046  |
| 1             | 0           | -0.407195               | 0.582210  | 1.890296  |
| 1             | 0           | 1.332742                | 0.586597  | 1.539242  |
| 1             | 0           | 2.006420                | -1.764281 | 1.039594  |
| 1             | 0           | -1.200179               | 2.710040  | -0.519178 |
| 8             | 0           | 3.509209                | 0.506402  | -0.228549 |
| 1             | 0           | 4.364375                | 0.197917  | -0.554097 |
| 1             | 0           | 2.862679                | -0.189672 | -0.436010 |

#### 2. Deoxyribose-Uracil

| Atomic Number | Atomic Type | Coordinates (Angstroms) |           |           |
|---------------|-------------|-------------------------|-----------|-----------|
|               |             | X                       | Y         | Z         |
| 8             | 0           | -1.664902               | -1.539291 | 1.694366  |
| 6             | 0           | -1.060059               | -1.960068 | 0.473206  |
| 6             | 0           | -1.418182               | -1.082840 | -0.716110 |
| 8             | 0           | -2.761673               | -1.331940 | -1.197098 |
| 6             | 0           | -3.661789               | -0.454102 | -0.552307 |
| 6             | 0           | -1.396179               | 0.411682  | -0.399597 |
| 6             | 0           | -2.853943               | 0.750549  | -0.066696 |
| 8             | 0           | -0.936417               | 1.088211  | -1.582306 |
| 8             | 0           | -4.257523               | -1.068802 | 0.599686  |

|   |   |           |           |           |
|---|---|-----------|-----------|-----------|
| 1 | 0 | -2.630203 | -1.570557 | 1.572449  |
| 1 | 0 | -1.320267 | -2.996109 | 0.232773  |
| 1 | 0 | 0.018005  | -1.905991 | 0.631134  |
| 1 | 0 | -0.751709 | -1.318497 | -1.547958 |
| 1 | 0 | -4.443314 | -0.224991 | -1.277161 |
| 1 | 0 | -0.734436 | 0.631531  | 0.442291  |
| 1 | 0 | -3.003250 | 0.883484  | 1.003937  |
| 1 | 0 | -3.153000 | 1.662552  | -0.582000 |
| 1 | 0 | -0.706284 | 2.001160  | -1.325592 |
| 1 | 0 | -4.794846 | -1.811935 | 0.286392  |
| 6 | 0 | 1.722610  | 2.139389  | -0.065659 |
| 6 | 0 | 2.773376  | 2.318771  | 0.913986  |
| 6 | 0 | 3.593567  | 1.277115  | 1.208969  |
| 7 | 0 | 3.506485  | 0.053360  | 0.586288  |
| 6 | 0 | 2.513870  | -0.208115 | -0.354919 |
| 7 | 0 | 1.753082  | 0.894730  | -0.700455 |
| 8 | 0 | 2.342300  | -1.325256 | -0.846863 |
| 8 | 0 | 0.852280  | 2.975647  | -0.359772 |
| 6 | 0 | 4.331451  | -1.081039 | 1.003754  |
| 1 | 0 | 2.858093  | 3.263962  | 1.426453  |
| 1 | 0 | 4.377487  | 1.359543  | 1.950043  |
| 1 | 0 | 0.980728  | 0.715500  | -1.349136 |
| 1 | 0 | 4.694427  | -1.600220 | 0.121628  |
| 1 | 0 | 3.749695  | -1.775711 | 1.607834  |
| 1 | 0 | 5.168121  | -0.696442 | 1.580246  |

### 3. Ribose-Acetone

| Atomic<br>Number | Atomic<br>Type | Coordinates (Angstroms) |           |           |
|------------------|----------------|-------------------------|-----------|-----------|
|                  |                | X                       | Y         | Z         |
| 6                | 0              | 3.268035                | 0.064224  | -0.256334 |
| 8                | 0              | 2.700113                | 1.012169  | -0.813919 |
| 6                | 0              | 3.068435                | -0.218051 | 1.210150  |
| 6                | 0              | 4.158712                | -0.868276 | -1.031555 |
| 1                | 0              | 2.226866                | -0.907140 | 1.319989  |
| 1                | 0              | 2.821185                | 0.699289  | 1.739506  |
| 1                | 0              | 3.951383                | -0.682514 | 1.646805  |
| 1                | 0              | 5.184061                | -0.774158 | -0.669207 |
| 1                | 0              | 4.117488                | -0.630915 | -2.090745 |
| 1                | 0              | 3.849369                | -1.901062 | -0.863331 |
| 8                | 0              | -1.209561               | -2.020746 | -1.052866 |
| 6                | 0              | -2.522685               | -1.461024 | -1.076025 |
| 6                | 0              | -2.605160               | -0.120829 | -0.366753 |
| 8                | 0              | -2.354839               | -0.287801 | 1.054994  |
| 6                | 0              | -0.997085               | -0.021041 | 1.339226  |
| 6                | 0              | -1.576738               | 0.909609  | -0.812821 |
| 6                | 0              | -0.371859               | 0.620965  | 0.095734  |

|   |   |           |           |           |
|---|---|-----------|-----------|-----------|
| 8 | 0 | 0.328018  | 1.812797  | 0.437010  |
| 8 | 0 | -2.095140 | 2.205443  | -0.540758 |
| 8 | 0 | -0.284453 | -1.238696 | 1.605449  |
| 1 | 0 | -0.956475 | -2.147611 | -0.122653 |
| 1 | 0 | -3.248223 | -2.142015 | -0.620229 |
| 1 | 0 | -2.780147 | -1.333932 | -2.128500 |
| 1 | 0 | -3.614162 | 0.286200  | -0.459335 |
| 1 | 0 | -0.950009 | 0.630505  | 2.212915  |
| 1 | 0 | -1.321168 | 0.806277  | -1.872376 |
| 1 | 0 | 0.290694  | -0.099260 | -0.383279 |
| 1 | 0 | 1.201643  | 1.765841  | 0.001743  |
| 1 | 0 | -1.330480 | 2.740782  | -0.265590 |
| 1 | 0 | -0.645046 | -1.609085 | 2.425285  |

---

#### 4. Ribose-Aldehyde

---

| Atomic<br>Number | Atomic<br>Type | Coordinates (Angstroms) |           |           |
|------------------|----------------|-------------------------|-----------|-----------|
|                  |                | X                       | Y         | Z         |
| 6                | 0              | 3.721297                | -0.242619 | -0.807228 |
| 8                | 0              | 3.066935                | 0.724805  | -1.200224 |
| 6                | 0              | 3.508676                | -0.950518 | 0.491594  |
| 1                | 0              | 4.530758                | -0.628016 | -1.447773 |
| 1                | 0              | 3.317379                | -2.007166 | 0.294613  |
| 1                | 0              | 2.678334                | -0.531667 | 1.052704  |
| 1                | 0              | 4.430554                | -0.895195 | 1.074809  |
| 8                | 0              | -1.320295               | -1.651269 | -1.527554 |
| 6                | 0              | -2.591987               | -1.171184 | -1.074570 |
| 6                | 0              | -2.359019               | -0.037539 | -0.100308 |
| 8                | 0              | -1.851040               | -0.564248 | 1.148571  |
| 6                | 0              | -0.545204               | -0.057955 | 1.411687  |
| 6                | 0              | -1.338529               | 0.993153  | -0.572346 |
| 6                | 0              | -0.047378               | 0.528558  | 0.099518  |
| 8                | 0              | 0.846289                | 1.611740  | 0.326893  |
| 8                | 0              | -1.718400               | 2.265740  | -0.052131 |
| 8                | 0              | 0.318714                | -1.099373 | 1.810883  |
| 1                | 0              | -1.433137               | -2.540686 | -1.884485 |
| 1                | 0              | -3.151393               | -1.957400 | -0.561869 |
| 1                | 0              | -3.184658               | -0.801017 | -1.918748 |
| 1                | 0              | -3.312322               | 0.458446  | 0.101980  |
| 1                | 0              | -0.604445               | 0.706536  | 2.193244  |
| 1                | 0              | -1.253477               | 1.026434  | -1.662525 |
| 1                | 0              | 0.413662                | -0.271229 | -0.481686 |
| 1                | 0              | 1.640325                | 1.457233  | -0.217059 |
| 1                | 0              | -0.887458               | 2.758539  | 0.062248  |
| 1                | 0              | -0.008881               | -1.445345 | 2.652964  |

---

#### 5. Ribose-Thymine

---

| Atomic<br>Number | Atomic<br>Type | Coordinates (Angstroms) |           |           |
|------------------|----------------|-------------------------|-----------|-----------|
|                  |                | X                       | Y         | Z         |
| 8                | 0              | -4.595078               | -0.081497 | 2.044510  |
| 6                | 0              | -4.749924               | -1.075729 | 1.033142  |
| 6                | 0              | -4.037170               | -0.683640 | -0.245453 |
| 8                | 0              | -4.634720               | 0.567719  | -0.687164 |
| 6                | 0              | -3.589890               | 1.492935  | -0.994339 |
| 6                | 0              | -2.526550               | -0.429398 | -0.104111 |
| 6                | 0              | -2.465057               | 1.095200  | -0.059998 |
| 8                | 0              | -1.192047               | 1.597076  | -0.458740 |
| 8                | 0              | -1.898193               | -0.956375 | -1.262573 |
| 8                | 0              | -3.995834               | 2.802597  | -0.695740 |
| 1                | 0              | -5.003983               | 0.723969  | 1.692596  |
| 1                | 0              | -5.808273               | -1.247803 | 0.813995  |
| 1                | 0              | -4.322693               | -1.995728 | 1.432846  |
| 1                | 0              | -4.183700               | -1.447021 | -1.014526 |
| 1                | 0              | -3.293655               | 1.396835  | -2.044510 |
| 1                | 0              | -2.122452               | -0.879486 | 0.807175  |
| 1                | 0              | -2.726074               | 1.441803  | 0.944200  |
| 1                | 0              | -1.185913               | 2.556396  | -0.316513 |
| 1                | 0              | -0.952911               | -1.097076 | -1.059998 |
| 1                | 0              | -4.621292               | 3.096252  | -1.372421 |
| 6                | 0              | 3.985397                | -0.120270 | 0.066589  |
| 6                | 0              | 3.746460                | 1.207336  | 0.231262  |
| 6                | 0              | 2.364624                | 1.668762  | 0.159286  |
| 7                | 0              | 1.420227                | 0.647034  | 0.019730  |
| 6                | 0              | 1.662949                | -0.684357 | -0.215561 |
| 7                | 0              | 2.987152                | -1.062851 | -0.105667 |
| 8                | 0              | 0.761887                | -1.503250 | -0.468124 |
| 8                | 0              | 2.005371                | 2.850159  | 0.240128  |
| 6                | 0              | 4.829117                | 2.223724  | 0.420410  |
| 6                | 0              | 3.312271                | -2.461533 | -0.385406 |
| 1                | 0              | 4.989685                | -0.524612 | 0.094864  |
| 1                | 0              | 0.445328                | 0.948792  | -0.109314 |
| 1                | 0              | 4.680603                | 2.769058  | 1.352448  |
| 1                | 0              | 4.809769                | 2.955490  | -0.387070 |
| 1                | 0              | 5.808182                | 1.746017  | 0.442368  |
| 1                | 0              | 3.297470                | -2.657257 | -1.457291 |
| 1                | 0              | 2.576660                | -3.096268 | 0.098984  |
| 1                | 0              | 4.301086                | -2.665924 | 0.016266  |

#### 6. Ribose-Uracil

| Atomic<br>Number | Atomic<br>Type | Coordinates (Angstroms) |           |          |
|------------------|----------------|-------------------------|-----------|----------|
|                  |                | X                       | Y         | Z        |
| 8                | 0              | -3.675618               | -0.876214 | 2.108877 |
| 6                | 0              | -3.784035               | -1.779567 | 1.009868 |

|   |   |           |           |           |
|---|---|-----------|-----------|-----------|
| 6 | 0 | -3.180199 | -1.193494 | -0.250338 |
| 8 | 0 | -3.923639 | 0.023304  | -0.538991 |
| 6 | 0 | -2.995498 | 1.077291  | -0.804531 |
| 6 | 0 | -1.698049 | -0.795244 | -0.140943 |
| 6 | 0 | -1.787244 | 0.718705  | 0.037133  |
| 8 | 0 | -0.594798 | 1.383594  | -0.371689 |
| 8 | 0 | -1.067108 | -1.153485 | -1.361328 |
| 8 | 0 | -3.515497 | 2.304122  | -0.366016 |
| 1 | 0 | -4.180433 | -0.087609 | 1.857620  |
| 1 | 0 | -4.830064 | -2.038465 | 0.819027  |
| 1 | 0 | -3.247519 | -2.684409 | 1.296393  |
| 1 | 0 | -3.285422 | -1.890960 | -1.086003 |
| 1 | 0 | -2.748322 | 1.106605  | -1.871348 |
| 1 | 0 | -1.211276 | -1.275846 | 0.712367  |
| 1 | 0 | -2.026705 | 0.948820  | 1.079400  |
| 1 | 0 | -0.651222 | 2.310597  | -0.092880 |
| 1 | 0 | -0.110931 | -1.251366 | -1.189903 |
| 1 | 0 | -4.202315 | 2.589960  | -0.983976 |
| 6 | 0 | 2.914098  | 1.671820  | 0.354031  |
| 6 | 0 | 4.291604  | 1.273946  | 0.587690  |
| 6 | 0 | 4.655644  | -0.020229 | 0.407899  |
| 7 | 0 | 3.781087  | -0.988846 | -0.039359 |
| 6 | 0 | 2.446242  | -0.692606 | -0.266099 |
| 7 | 0 | 2.109787  | 0.631247  | -0.133453 |
| 8 | 0 | 1.632046  | -1.572330 | -0.592910 |
| 8 | 0 | 2.440796  | 2.799461  | 0.527131  |
| 6 | 0 | 4.181748  | -2.391668 | -0.150380 |
| 1 | 0 | 4.995919  | 2.009834  | 0.942602  |
| 1 | 0 | 5.666421  | -0.362921 | 0.584418  |
| 1 | 0 | 1.112598  | 0.852845  | -0.256695 |
| 1 | 0 | 3.787480  | -2.801749 | -1.075459 |
| 1 | 0 | 3.793003  | -2.970784 | 0.685996  |
| 1 | 0 | 5.267357  | -2.432676 | -0.158450 |

#### 7. Ribose-Gly dipeptide

| Atomic<br>Number | Atomic<br>Type | Coordinates (Angstroms) |           |           |
|------------------|----------------|-------------------------|-----------|-----------|
|                  |                | X                       | Y         | Z         |
| 8                | 0              | 2.670390                | 1.186642  | 2.221684  |
| 6                | 0              | 2.491303                | 2.113177  | 1.151123  |
| 6                | 0              | 2.315880                | 1.408736  | -0.180715 |
| 8                | 0              | 3.515053                | 0.615204  | -0.408732 |
| 6                | 0              | 3.140190                | -0.735151 | -0.687150 |
| 6                | 0              | 1.130230                | 0.428263  | -0.264417 |
| 6                | 0              | 1.805392                | -0.903938 | 0.014050  |
| 8                | 0              | 1.036150                | -2.006540 | -0.458453 |
| 8                | 0              | 0.594187                | 0.379215  | -1.578545 |

|   |   |           |           |           |
|---|---|-----------|-----------|-----------|
| 8 | 0 | 4.065275  | -1.627795 | -0.119097 |
| 1 | 0 | 3.494481  | 0.712180  | 2.033140  |
| 1 | 0 | 3.342071  | 2.798095  | 1.082715  |
| 1 | 0 | 1.597457  | 2.692016  | 1.386515  |
| 1 | 0 | 2.219642  | 2.146187  | -0.983042 |
| 1 | 0 | 3.054389  | -0.888623 | -1.767997 |
| 1 | 0 | 0.357038  | 0.668014  | 0.472206  |
| 1 | 0 | 2.002893  | -0.991907 | 1.085873  |
| 1 | 0 | 1.528362  | -2.812802 | -0.243500 |
| 1 | 0 | -0.096097 | 1.075539  | -1.630029 |
| 1 | 0 | 4.881208  | -1.600987 | -0.638044 |
| 7 | 0 | -3.378129 | 1.325039  | 0.114178  |
| 6 | 0 | -3.413068 | 2.588659  | 0.831754  |
| 6 | 0 | -2.442030 | 1.081186  | -0.819929 |
| 8 | 0 | -1.609769 | 1.942960  | -1.187280 |
| 6 | 0 | -2.452234 | -0.334639 | -1.392587 |
| 7 | 0 | -1.869467 | -1.285147 | -0.458300 |
| 6 | 0 | -2.606203 | -1.796476 | 0.559483  |
| 8 | 0 | -3.785461 | -1.442021 | 0.766314  |
| 6 | 0 | -1.929146 | -2.831598 | 1.423174  |
| 1 | 0 | -3.903670 | 0.521129  | 0.449931  |
| 1 | 0 | -4.323043 | 2.620478  | 1.424384  |
| 1 | 0 | -3.411105 | 3.412062  | 0.121293  |
| 1 | 0 | -2.547519 | 2.695353  | 1.487144  |
| 1 | 0 | -1.860610 | -0.343093 | -2.303686 |
| 1 | 0 | -3.476484 | -0.641556 | -1.612597 |
| 1 | 0 | -0.898794 | -1.561909 | -0.581700 |
| 1 | 0 | -2.056740 | -2.550805 | 2.466830  |
| 1 | 0 | -0.870886 | -2.931160 | 1.193223  |
| 1 | 0 | -2.427907 | -3.788091 | 1.270357  |

### 8. Ribose-Methanol

| Atomic<br>Number | Atomic<br>Type | Coordinates (Angstroms) |           |           |
|------------------|----------------|-------------------------|-----------|-----------|
|                  |                | X                       | Y         | Z         |
| 8                | 0              | -2.433831               | -1.179634 | 1.383433  |
| 6                | 0              | -2.478667               | -1.627039 | 0.024507  |
| 6                | 0              | -1.439532               | -0.867133 | -0.767916 |
| 8                | 0              | -1.893578               | 0.497163  | -0.959381 |
| 6                | 0              | -0.881498               | 1.393680  | -0.507834 |
| 6                | 0              | -0.058591               | -0.783883 | -0.100382 |
| 6                | 0              | -0.124596               | 0.599737  | 0.536921  |
| 8                | 0              | 1.166564                | 1.136801  | 0.837124  |
| 8                | 0              | 0.908456                | -0.859356 | -1.139431 |
| 8                | 0              | -1.447634               | 2.526928  | 0.101096  |
| 1                | 0              | -3.260393               | -1.420285 | 1.819409  |
| 1                | 0              | -3.458362               | -1.440119 | -0.422215 |

|   |   |           |           |           |
|---|---|-----------|-----------|-----------|
| 1 | 0 | -2.255914 | -2.698270 | -0.034561 |
| 1 | 0 | -1.320213 | -1.338462 | -1.747206 |
| 1 | 0 | -0.234882 | 1.682679  | -1.343831 |
| 1 | 0 | 0.088472  | -1.572477 | 0.642627  |
| 1 | 0 | -0.748682 | 0.551861  | 1.432398  |
| 1 | 0 | 1.024594  | 1.993976  | 1.264209  |
| 1 | 0 | 1.792155  | -0.901548 | -0.720059 |
| 1 | 0 | -1.873116 | 3.062045  | -0.582867 |
| 6 | 0 | 4.468061  | -0.227523 | -0.112323 |
| 8 | 0 | 3.226648  | -0.688417 | 0.428648  |
| 1 | 0 | 4.943052  | -1.085649 | -0.578802 |
| 1 | 0 | 5.120888  | 0.157284  | 0.672555  |
| 1 | 0 | 4.309729  | 0.547324  | -0.865057 |
| 1 | 0 | 2.748616  | 0.066713  | 0.813641  |

### 9. Fructose-Acetone

| Atomic<br>Number | Atomic<br>Type | Coordinates (Angstroms) |           |           |
|------------------|----------------|-------------------------|-----------|-----------|
|                  |                | X                       | Y         | Z         |
| 8                | 0              | -1.533478               | 2.486786  | -0.595078 |
| 6                | 0              | -0.520737               | 1.614914  | -0.181244 |
| 6                | 0              | -2.637253               | 1.833725  | -1.256180 |
| 6                | 0              | -1.058197               | 0.522705  | 0.768784  |
| 6                | 0              | 0.586868                | 2.483215  | 0.403610  |
| 6                | 0              | -3.271698               | 0.766495  | -0.370865 |
| 8                | 0              | -4.303696               | 0.090729  | -1.086761 |
| 6                | 0              | -2.216888               | -0.227539 | 0.108032  |
| 8                | 0              | 0.115158                | 3.127411  | 1.596329  |
| 8                | 0              | 0.022293                | 0.969421  | -1.347595 |
| 8                | 0              | -1.590851               | 1.040359  | 1.982468  |
| 8                | 0              | -1.790390               | -1.055176 | -0.987473 |
| 1                | 0              | -3.352158               | 2.624374  | -1.471008 |
| 1                | 0              | -2.302811               | 1.401321  | -2.203491 |
| 1                | 0              | -0.236465               | -0.177612 | 0.971481  |
| 1                | 0              | 1.447372                | 1.844543  | 0.621185  |
| 1                | 0              | 0.851547                | 3.215652  | -0.361526 |
| 1                | 0              | -3.733170               | 1.238342  | 0.495636  |
| 1                | 0              | -3.859116               | -0.613754 | -1.586456 |
| 1                | 0              | -2.660248               | -0.903748 | 0.840714  |
| 1                | 0              | 0.854630                | 3.589661  | 2.011887  |
| 1                | 0              | 0.810837                | 0.456314  | -1.067947 |
| 1                | 0              | -1.097992               | 1.849700  | 2.203506  |
| 1                | 0              | -1.190353               | -0.499100 | -1.519150 |
| 6                | 0              | 2.344498                | -1.718109 | -0.141647 |
| 8                | 0              | 2.196228                | -0.500412 | -0.311569 |
| 6                | 0              | 1.321823                | -2.715546 | -0.615800 |
| 6                | 0              | 3.577728                | -2.252991 | 0.534241  |

|   |   |          |           |           |
|---|---|----------|-----------|-----------|
| 1 | 0 | 1.298004 | -3.589676 | 0.033722  |
| 1 | 0 | 1.616547 | -3.054840 | -1.612167 |
| 1 | 0 | 0.332962 | -2.265854 | -0.677002 |
| 1 | 0 | 3.299026 | -2.676056 | 1.501450  |
| 1 | 0 | 4.303711 | -1.457703 | 0.677933  |
| 1 | 0 | 4.010056 | -3.060547 | -0.057922 |

### 10. Fructose-Thymine

| Atomic<br>Number | Atomic<br>Type | Coordinates (Angstroms) |           |           |
|------------------|----------------|-------------------------|-----------|-----------|
|                  |                | X                       | Y         | Z         |
| 8                | 0              | 3.512735                | 1.211802  | -0.215894 |
| 6                | 0              | 3.470568                | -0.086590 | -0.715741 |
| 6                | 0              | 2.243567                | 1.715602  | 0.262184  |
| 6                | 0              | 2.894397                | -1.096849 | 0.301372  |
| 6                | 0              | 4.877156                | -0.406371 | -1.212099 |
| 6                | 0              | 1.641719                | 0.805875  | 1.326240  |
| 8                | 0              | 0.400754                | 1.321159  | 1.779032  |
| 6                | 0              | 1.526237                | -0.627000 | 0.806379  |
| 8                | 0              | 5.780435                | -0.450329 | -0.103396 |
| 8                | 0              | 2.614092                | -0.068559 | -1.884900 |
| 8                | 0              | 3.699198                | -1.235905 | 1.464060  |
| 8                | 0              | 0.517458                | -0.754947 | -0.207409 |
| 1                | 0              | 2.468901                | 2.691774  | 0.684339  |
| 1                | 0              | 1.555025                | 1.850755  | -0.577702 |
| 1                | 0              | 2.773213                | -2.063888 | -0.209576 |
| 1                | 0              | 4.852034                | -1.373059 | -1.727269 |
| 1                | 0              | 5.149334                | 0.380103  | -1.918495 |
| 1                | 0              | 2.305767                | 0.786272  | 2.190423  |
| 1                | 0              | -0.202298               | 1.413856  | 1.015154  |
| 1                | 0              | 1.211132                | -1.284153 | 1.617605  |
| 1                | 0              | 6.661590                | -0.683589 | -0.423790 |
| 1                | 0              | 2.615049                | -0.954502 | -2.281006 |
| 1                | 0              | 4.628684                | -1.096529 | 1.214657  |
| 1                | 0              | 0.831650                | -0.280517 | -0.995920 |
| 6                | 0              | -4.843448               | 0.363319  | -0.217337 |
| 6                | 0              | -4.637686               | -0.972924 | -0.084973 |
| 6                | 0              | -3.263058               | -1.455340 | 0.013005  |
| 7                | 0              | -2.295566               | -0.443424 | 0.038630  |
| 6                | 0              | -2.498641               | 0.903410  | -0.149191 |
| 7                | 0              | -3.821107               | 1.294755  | -0.215947 |
| 8                | 0              | -1.568334               | 1.726666  | -0.226038 |
| 8                | 0              | -2.940165               | -2.645527 | 0.090581  |
| 6                | 0              | -5.744685               | -1.980603 | -0.082415 |
| 6                | 0              | -4.083290               | 2.719234  | -0.417752 |
| 1                | 0              | -5.839021               | 0.780529  | -0.303939 |
| 1                | 0              | -1.307234               | -0.726851 | 0.039988  |



|   |   |           |           |           |
|---|---|-----------|-----------|-----------|
| 1 | 0 | -5.724712 | -2.564571 | 0.837779  |
| 1 | 0 | -5.625574 | -2.680555 | -0.909410 |
| 1 | 0 | -6.714010 | -1.490381 | -0.169632 |
| 1 | 0 | -3.780776 | 3.027755  | -1.417460 |
| 1 | 0 | -3.520415 | 3.294634  | 0.312004  |
| 1 | 0 | -5.148028 | 2.888154  | -0.282848 |

### 11. Fructose-Uracil

| Atomic<br>Number | Atomic<br>Type | Coordinates (Angstroms) |           |           |
|------------------|----------------|-------------------------|-----------|-----------|
|                  |                | X                       | Y         | Z         |
| 8                | 0              | 3.362518                | 1.162950  | -0.209807 |
| 6                | 0              | 3.261554                | -0.134605 | -0.703032 |
| 6                | 0              | 2.112722                | 1.733396  | 0.243700  |
| 6                | 0              | 2.623820                | -1.108052 | 0.313008  |
| 6                | 0              | 4.656197                | -0.527116 | -1.180465 |
| 6                | 0              | 1.449387                | 0.862946  | 1.303971  |
| 8                | 0              | 0.225638                | 1.439778  | 1.729190  |
| 6                | 0              | 1.273832                | -0.568769 | 0.796862  |
| 8                | 0              | 5.542502                | -0.609983 | -0.060330 |
| 8                | 0              | 2.420358                | -0.081545 | -1.881743 |
| 8                | 0              | 3.405514                | -1.277532 | 1.487477  |
| 8                | 0              | 0.270213                | -0.662986 | -0.226225 |
| 1                | 0              | 2.379705                | 2.700217  | 0.663031  |
| 1                | 0              | 1.445911                | 1.896814  | -0.608441 |
| 1                | 0              | 2.462434                | -2.071962 | -0.192808 |
| 1                | 0              | 4.589110                | -1.494226 | -1.691108 |
| 1                | 0              | 4.975816                | 0.240889  | -1.887279 |
| 1                | 0              | 2.096262                | 0.819706  | 2.180342  |
| 1                | 0              | -0.337121               | 1.598612  | 0.945413  |
| 1                | 0              | 0.920019                | -1.201620 | 1.611462  |
| 1                | 0              | 6.416112                | -0.883857 | -0.368942 |
| 1                | 0              | 2.380222                | -0.969464 | -2.271199 |
| 1                | 0              | 4.343819                | -1.184457 | 1.249809  |
| 1                | 0              | 0.607854                | -0.199655 | -1.011819 |
| 6                | 0              | -2.623817               | 1.264635  | -0.289689 |
| 6                | 0              | -3.989831               | 1.708239  | -0.464466 |
| 6                | 0              | -4.998851               | 0.804108  | -0.373972 |
| 7                | 0              | -4.785975               | -0.523186 | -0.090268 |
| 6                | 0              | -3.496051               | -1.040478 | 0.047924  |
| 7                | 0              | -2.492608               | -0.087975 | 0.009097  |
| 8                | 0              | -3.288494               | -2.242412 | 0.213934  |
| 8                | 0              | -1.618326               | 1.994848  | -0.368301 |
| 6                | 0              | -5.883157               | -1.489479 | -0.065424 |
| 1                | 0              | -4.180134               | 2.746831  | -0.683576 |
| 1                | 0              | -6.035561               | 1.087960  | -0.498467 |
| 1                | 0              | -1.527839               | -0.443501 | 0.051906  |

|   |   |           |           |           |
|---|---|-----------|-----------|-----------|
| 1 | 0 | -5.776918 | -2.126904 | 0.807683  |
| 1 | 0 | -5.865766 | -2.112672 | -0.958244 |
| 1 | 0 | -6.818053 | -0.938469 | -0.013627 |

## 12. Fructose-Gly dipeptide

| Atomic<br>Number | Atomic<br>Type | Coordinates (Angstroms) |           |           |
|------------------|----------------|-------------------------|-----------|-----------|
|                  |                | X                       | Y         | Z         |
| 8                | 0              | 3.143299                | -0.378249 | -0.985059 |
| 6                | 0              | 2.017657                | -0.886159 | -0.325996 |
| 6                | 0              | 3.013028                | 1.002908  | -1.378077 |
| 6                | 0              | 1.689533                | -0.072245 | 0.944862  |
| 6                | 0              | 2.276514                | -2.366777 | -0.080480 |
| 6                | 0              | 2.723507                | 1.907044  | -0.183432 |
| 8                | 0              | 2.520560                | 3.248627  | -0.621799 |
| 6                | 0              | 1.507308                | 1.404352  | 0.588331  |
| 8                | 0              | 3.356362                | -2.515474 | 0.853659  |
| 8                | 0              | 0.892947                | -0.796244 | -1.220074 |
| 8                | 0              | 2.727680                | -0.090886 | 1.915867  |
| 8                | 0              | 0.310171                | 1.632339  | -0.188339 |
| 1                | 0              | 3.966661                | 1.266578  | -1.828997 |
| 1                | 0              | 2.231196                | 1.103491  | -2.136857 |
| 1                | 0              | 0.755505                | -0.473871 | 1.358671  |
| 1                | 0              | 1.358204                | -2.813807 | 0.310158  |
| 1                | 0              | 2.527249                | -2.811035 | -1.045824 |
| 1                | 0              | 3.582609                | 1.914645  | 0.485776  |
| 1                | 0              | 1.597367                | 3.296939  | -0.917776 |
| 1                | 0              | 1.389240                | 1.984469  | 1.505076  |
| 1                | 0              | 3.420893                | -3.445823 | 1.106028  |
| 1                | 0              | 0.152313                | -1.316648 | -0.831526 |
| 1                | 0              | 3.167537                | -0.957630 | 1.860682  |
| 1                | 0              | 0.301934                | 0.914976  | -0.857286 |
| 7                | 0              | -3.422276               | -1.658888 | -0.353365 |
| 6                | 0              | -3.491316               | -2.567102 | -1.487835 |
| 6                | 0              | -2.268934               | -1.440924 | 0.296623  |
| 8                | 0              | -1.208291               | -2.054718 | 0.026035  |
| 6                | 0              | -2.323541               | -0.365463 | 1.375185  |
| 7                | 0              | -2.336641               | 0.963304  | 0.785020  |
| 6                | 0              | -3.493431               | 1.499143  | 0.315369  |
| 8                | 0              | -4.579086               | 0.888091  | 0.381485  |
| 6                | 0              | -3.391969               | 2.887339  | -0.264955 |
| 1                | 0              | -4.188647               | -1.021836 | -0.148077 |
| 1                | 0              | -4.530396               | -2.653761 | -1.791949 |
| 1                | 0              | -3.112597               | -3.545284 | -1.199859 |
| 1                | 0              | -2.895347               | -2.196476 | -2.322151 |
| 1                | 0              | -1.439514               | -0.464466 | 2.000682  |
| 1                | 0              | -3.217606               | -0.481675 | 1.989549  |

|   |   |           |          |           |
|---|---|-----------|----------|-----------|
| 1 | 0 | -1.440997 | 1.398584 | 0.566846  |
| 1 | 0 | -3.866415 | 2.892698 | -1.244273 |
| 1 | 0 | -2.361731 | 3.227638 | -0.350979 |
| 1 | 0 | -3.944309 | 3.570795 | 0.378731  |

---

### 13. Fructose-Methanol

---

| Atomic<br>Number | Atomic<br>Type | Coordinates (Angstroms) |           |           |
|------------------|----------------|-------------------------|-----------|-----------|
|                  |                | X                       | Y         | Z         |
| 8                | 0              | 1.360593                | -0.130707 | 1.339456  |
| 6                | 0              | 1.628061                | 0.584621  | 0.177919  |
| 6                | 0              | -0.037968               | -0.440271 | 1.557624  |
| 6                | 0              | 1.061290                | -0.092917 | -1.091319 |
| 6                | 0              | 3.133628                | 0.830271  | 0.157219  |
| 6                | 0              | -0.622648               | -1.198679 | 0.373659  |
| 8                | 0              | -1.968731               | -1.570036 | 0.615409  |
| 6                | 0              | -0.431892               | -0.394978 | -0.912907 |
| 8                | 0              | 3.818432                | -0.415562 | 0.009082  |
| 8                | 0              | 0.995422                | 1.885574  | 0.315282  |
| 8                | 0              | 1.672289                | -1.341445 | -1.382676 |
| 8                | 0              | -1.211679               | 0.815298  | -0.931345 |
| 1                | 0              | -0.052403               | -1.061650 | 2.449221  |
| 1                | 0              | -0.595773               | 0.478588  | 1.761651  |
| 1                | 0              | 1.187111                | 0.608095  | -1.929907 |
| 1                | 0              | 3.367040                | 1.499358  | -0.679158 |
| 1                | 0              | 3.387834                | 1.316713  | 1.100969  |
| 1                | 0              | -0.067046               | -2.128899 | 0.252899  |
| 1                | 0              | -2.537126               | -0.774581 | 0.661937  |
| 1                | 0              | -0.772708               | -0.985378 | -1.764193 |
| 1                | 0              | 4.770860                | -0.253569 | -0.005365 |
| 1                | 0              | 1.335927                | 2.473689  | -0.377140 |
| 1                | 0              | 2.591357                | -1.319124 | -1.066124 |
| 1                | 0              | -0.739331               | 1.459536  | -0.374179 |
| 6                | 0              | -4.910210               | 0.339747  | -0.334579 |
| 8                | 0              | -3.676831               | 0.666742  | 0.311551  |
| 1                | 0              | -5.611085               | 0.068411  | 0.449642  |
| 1                | 0              | -4.790500               | -0.506522 | -1.013953 |
| 1                | 0              | -5.305555               | 1.194510  | -0.885615 |
| 1                | 0              | -3.006130               | 0.885139  | -0.360454 |

---

### 14. Fructose-Fructose

---

| Atomic<br>Number | Atomic<br>Type | Coordinates (Angstroms) |           |           |
|------------------|----------------|-------------------------|-----------|-----------|
|                  |                | X                       | Y         | Z         |
| 8                | 0              | 4.366516                | -1.238323 | 0.546263  |
| 6                | 0              | 4.394745                | 0.152442  | 0.575954  |
| 6                | 0              | 3.038882                | -1.816251 | 0.535322  |
| 6                | 0              | 3.582638                | 0.790916  | -0.572597 |

|   |   |           |           |           |
|---|---|-----------|-----------|-----------|
| 6 | 0 | 5.865016  | 0.556368  | 0.626303  |
| 6 | 0 | 2.207942  | -1.291244 | -0.629286 |
| 8 | 0 | 0.914463  | -1.874861 | -0.611142 |
| 6 | 0 | 2.156572  | 0.233202  | -0.593724 |
| 8 | 0 | 6.508342  | 0.183936  | -0.595645 |
| 8 | 0 | 3.809059  | 0.569380  | 1.837207  |
| 8 | 0 | 4.117921  | 0.508005  | -1.857836 |
| 8 | 0 | 1.376362  | 0.694989  | 0.518927  |
| 1 | 0 | 3.198867  | -2.886969 | 0.436569  |
| 1 | 0 | 2.541469  | -1.625234 | 1.490728  |
| 1 | 0 | 3.539792  | 1.876250  | -0.396297 |
| 1 | 0 | 5.922653  | 1.640333  | 0.776855  |
| 1 | 0 | 6.305215  | 0.041771  | 1.482593  |
| 1 | 0 | 2.681367  | -1.591788 | -1.564215 |
| 1 | 0 | 0.338724  | -1.378109 | 0.001159  |
| 1 | 0 | 1.649562  | 0.607508  | -1.484318 |
| 1 | 0 | 7.431051  | 0.469001  | -0.565548 |
| 1 | 0 | 3.916251  | 1.530012  | 1.923323  |
| 1 | 0 | 5.082921  | 0.419890  | -1.778615 |
| 1 | 0 | 1.910499  | 0.580675  | 1.322738  |
| 8 | 0 | -4.366868 | 1.238029  | 0.546079  |
| 6 | 0 | -4.394679 | -0.152748 | 0.575992  |
| 6 | 0 | -3.039461 | 1.816491  | 0.535102  |
| 6 | 0 | -3.582176 | -0.791199 | -0.572295 |
| 6 | 0 | -5.864869 | -0.557036 | 0.626068  |
| 6 | 0 | -2.208330 | 1.291633  | -0.629429 |
| 8 | 0 | -0.914921 | 1.875433  | -0.611305 |
| 6 | 0 | -2.156414 | -0.232766 | -0.593530 |
| 8 | 0 | -6.508002 | -0.184260 | -0.595859 |
| 8 | 0 | -3.809026 | -0.569330 | 1.837358  |
| 8 | 0 | -4.117615 | -0.509212 | -1.857678 |
| 8 | 0 | -1.376007 | -0.693713 | 0.519377  |
| 1 | 0 | -3.199892 | 2.887135  | 0.436262  |
| 1 | 0 | -2.541963 | 1.625745  | 1.490518  |
| 1 | 0 | -3.538763 | -1.876442 | -0.395591 |
| 1 | 0 | -5.922318 | -1.641076 | 0.776199  |
| 1 | 0 | -6.305319 | -0.042837 | 1.482465  |
| 1 | 0 | -2.681783 | 1.591917  | -1.564427 |
| 1 | 0 | -0.339443 | 1.378859  | 0.001388  |
| 1 | 0 | -1.649145 | -0.607086 | -1.483973 |
| 1 | 0 | -7.430917 | -0.468653 | -0.565742 |
| 1 | 0 | -3.916569 | -1.529882 | 1.923943  |
| 1 | 0 | -5.082509 | -0.420009 | -1.778229 |
| 1 | 0 | -1.910737 | -0.580446 | 1.322949  |

---

**15. Fructose-Deoxyribose**

---

| Atomic<br>Number | Atomic<br>Type | Coordinates (Angstroms) |           |           |
|------------------|----------------|-------------------------|-----------|-----------|
|                  |                | X                       | Y         | Z         |
| 8                | 0              | -4.038162               | 0.088654  | -1.015930 |
| 6                | 0              | -2.663223               | 0.303207  | -0.754883 |
| 6                | 0              | -4.382538               | -1.302979 | -1.007614 |
| 6                | 0              | -2.274826               | -0.268616 | 0.630219  |
| 6                | 0              | -2.451660               | 1.810516  | -0.882050 |
| 6                | 0              | -4.198532               | -1.854736 | 0.397827  |
| 8                | 0              | -4.465408               | -3.266693 | 0.455444  |
| 6                | 0              | -2.749161               | -1.708923 | 0.840683  |
| 8                | 0              | -3.278824               | 2.525085  | 0.050217  |
| 8                | 0              | -1.903290               | -0.265747 | -1.798737 |
| 8                | 0              | -2.878662               | 0.443222  | 1.708054  |
| 8                | 0              | -1.921753               | -2.626648 | 0.108307  |
| 1                | 0              | -5.428070               | -1.345322 | -1.314438 |
| 1                | 0              | -3.769516               | -1.855652 | -1.722626 |
| 1                | 0              | -1.182205               | -0.228729 | 0.719864  |
| 1                | 0              | -1.391983               | 2.015533  | -0.701797 |
| 1                | 0              | -2.704529               | 2.069855  | -1.911194 |
| 1                | 0              | -4.832092               | -1.305069 | 1.097595  |
| 1                | 0              | -5.383713               | -3.427536 | 0.199280  |
| 1                | 0              | -2.672318               | -1.921921 | 1.911209  |
| 1                | 0              | -3.055649               | 3.464310  | 0.006607  |
| 1                | 0              | -1.089111               | -0.703369 | -1.471069 |
| 1                | 0              | -3.121338               | 1.334183  | 1.395340  |
| 1                | 0              | -2.413620               | -3.464294 | 0.076157  |
| 8                | 0              | 3.098602                | 0.357086  | 1.668655  |
| 6                | 0              | 2.347610                | 1.019913  | 0.657669  |
| 6                | 0              | 1.911500                | 0.101700  | -0.473785 |
| 8                | 0              | 3.018051                | -0.259705 | -1.331680 |
| 6                | 0              | 3.599060                | -1.467270 | -0.871704 |
| 6                | 0              | 1.344666                | -1.235367 | -0.002304 |
| 6                | 0              | 2.557739                | -2.171173 | 0.000946  |
| 8                | 0              | 0.363754                | -1.646881 | -0.965988 |
| 8                | 0              | 4.748260                | -1.211853 | -0.054947 |
| 1                | 0              | 3.897186                | -0.014008 | 1.253525  |
| 1                | 0              | 2.905151                | 1.858932  | 0.227707  |
| 1                | 0              | 1.458923                | 1.414581  | 1.155045  |
| 1                | 0              | 1.194992                | 0.624298  | -1.112152 |
| 1                | 0              | 3.906600                | -2.019196 | -1.760132 |
| 1                | 0              | 0.894089                | -1.155746 | 0.990616  |
| 1                | 0              | 2.956802                | -2.304779 | 1.005371  |
| 1                | 0              | 2.284332                | -3.143478 | -0.406509 |
| 1                | 0              | -0.232941               | -2.296875 | -0.546204 |
| 1                | 0              | 5.428085                | -0.816116 | -0.620773 |

---

**16. Glucose-Acetone**

---

| Atomic<br>Number | Atomic<br>Type | Coordinates (Angstroms) |           |           |
|------------------|----------------|-------------------------|-----------|-----------|
|                  |                | X                       | Y         | Z         |
| 8                | 0              | 2.177446                | 1.438689  | 0.095401  |
| 6                | 0              | 2.462663                | 0.096811  | -0.340558 |
| 6                | 0              | 0.840110                | 1.804682  | -0.221102 |
| 6                | 0              | 1.551880                | -0.845448 | 0.435860  |
| 6                | 0              | 3.941791                | -0.152741 | -0.080500 |
| 8                | 0              | 1.833215                | -2.187792 | 0.035743  |
| 8                | 0              | 0.624615                | 3.126748  | 0.194864  |
| 6                | 0              | -0.159419               | 0.940912  | 0.535045  |
| 8                | 0              | -1.493306               | 1.296886  | 0.157588  |
| 6                | 0              | 0.086020                | -0.519220 | 0.197373  |
| 8                | 0              | 4.403431                | -1.323043 | -0.745214 |
| 8                | 0              | -0.660219               | -1.415905 | 1.015095  |
| 1                | 0              | 2.271816                | -0.003101 | -1.418040 |
| 1                | 0              | 0.685902                | 1.701541  | -1.306633 |
| 1                | 0              | 1.763800                | -0.720812 | 1.506249  |
| 1                | 0              | 4.514746                | 0.681975  | -0.481513 |
| 1                | 0              | 4.115030                | -0.204707 | 1.000316  |
| 1                | 0              | 1.133576                | -2.732524 | 0.432694  |
| 1                | 0              | 1.236360                | 3.701366  | -0.287523 |
| 1                | 0              | -0.004582               | 1.101402  | 1.608200  |
| 1                | 0              | -1.555562               | 2.256701  | 0.285619  |
| 1                | 0              | -0.151885               | -0.688199 | -0.860629 |
| 1                | 0              | 3.816475                | -2.050147 | -0.484618 |
| 1                | 0              | -1.507686               | -1.593238 | 0.562957  |
| 6                | 0              | -3.757282               | -0.649321 | -0.342286 |
| 8                | 0              | -2.910535               | -1.505763 | -0.621589 |
| 6                | 0              | -4.163569               | -0.380145 | 1.082527  |
| 6                | 0              | -4.408471               | 0.179160  | -1.415826 |
| 1                | 0              | -5.229366               | -0.164477 | 1.153058  |
| 1                | 0              | -3.609278               | 0.495244  | 1.424038  |
| 1                | 0              | -3.908324               | -1.227382 | 1.714383  |
| 1                | 0              | -5.472502               | -0.059277 | -1.468895 |
| 1                | 0              | -3.937249               | -0.017670 | -2.374566 |
| 1                | 0              | -4.320798               | 1.236605  | -1.163409 |

---

**17. Glucose-Gly dipeptide**

---

| Atomic<br>Number | Atomic<br>Type | Coordinates (Angstroms) |           |           |
|------------------|----------------|-------------------------|-----------|-----------|
|                  |                | X                       | Y         | Z         |
| 8                | 0              | 3.189109                | -0.871704 | 0.350127  |
| 6                | 0              | 2.644972                | 0.447951  | 0.518640  |
| 6                | 0              | 2.154047                | -1.844963 | 0.401848  |
| 6                | 0              | 1.761496                | 0.771790  | -0.684793 |
| 6                | 0              | 3.823108                | 1.402687  | 0.670070  |

---

|   |   |           |           |           |
|---|---|-----------|-----------|-----------|
| 8 | 0 | 1.234878  | 2.085234  | -0.455171 |
| 8 | 0 | 2.721871  | -3.120005 | 0.286455  |
| 6 | 0 | 1.213741  | -1.678317 | -0.778029 |
| 8 | 0 | 0.098643  | -2.571050 | -0.656024 |
| 6 | 0 | 0.657895  | -0.269401 | -0.845322 |
| 8 | 0 | 3.421209  | 2.665927  | 1.187683  |
| 8 | 0 | -0.008132 | -0.173051 | -2.100514 |
| 1 | 0 | 2.040186  | 0.493302  | 1.435987  |
| 1 | 0 | 1.605029  | -1.737067 | 1.350749  |
| 1 | 0 | 2.379708  | 0.764379  | -1.591479 |
| 1 | 0 | 4.523594  | 0.978751  | 1.388131  |
| 1 | 0 | 4.334012  | 1.504465  | -0.294031 |
| 1 | 0 | 0.397861  | 2.216623  | -0.938953 |
| 1 | 0 | 3.332295  | -3.249003 | 1.026688  |
| 1 | 0 | 1.778663  | -1.884982 | -1.692942 |
| 1 | 0 | 0.442857  | -3.472656 | -0.743812 |
| 1 | 0 | -0.050399 | -0.136334 | -0.012665 |
| 1 | 0 | 2.697822  | 2.983667  | 0.624410  |
| 1 | 0 | -0.505262 | 0.669299  | -2.116027 |
| 7 | 0 | -2.611492 | 1.870329  | 0.563982  |
| 6 | 0 | -1.949982 | 3.022518  | 1.162014  |
| 6 | 0 | -2.303803 | 1.443245  | -0.665091 |
| 8 | 0 | -1.464352 | 2.029170  | -1.399148 |
| 6 | 0 | -3.015003 | 0.172160  | -1.126459 |
| 7 | 0 | -2.564863 | -1.003184 | -0.396828 |
| 6 | 0 | -3.071874 | -1.293170 | 0.830653  |
| 8 | 0 | -3.893931 | -0.539998 | 1.392221  |
| 6 | 0 | -2.618067 | -2.588777 | 1.452571  |
| 1 | 0 | -3.255471 | 1.292049  | 1.101008  |
| 1 | 0 | -2.367883 | 3.174230  | 2.152924  |
| 1 | 0 | -2.121349 | 3.909958  | 0.555151  |
| 1 | 0 | -0.876585 | 2.852257  | 1.237690  |
| 1 | 0 | -2.802658 | 0.028894  | -2.182573 |
| 1 | 0 | -4.091606 | 0.279158  | -0.980793 |
| 1 | 0 | -1.815919 | -1.568589 | -0.785604 |
| 1 | 0 | -2.541000 | -2.448798 | 2.528043  |
| 1 | 0 | -1.666652 | -2.921065 | 1.043752  |
| 1 | 0 | -3.376289 | -3.349077 | 1.262617  |

### 18. Glucose-Thymine

| Atomic<br>Number | Atomic<br>Type | Coordinates (Angstroms) |           |           |
|------------------|----------------|-------------------------|-----------|-----------|
|                  |                | X                       | Y         | Z         |
| 8                | 0              | 2.443750                | -1.378875 | -0.226680 |
| 6                | 0              | 3.768888                | -0.910991 | 0.077551  |
| 6                | 0              | 1.443809                | -0.712584 | 0.541864  |
| 6                | 0              | 3.850093                | 0.556908  | -0.327083 |

|   |   |           |           |           |
|---|---|-----------|-----------|-----------|
| 6 | 0 | 4.738828  | -1.798772 | -0.690391 |
| 8 | 0 | 5.170408  | 1.032239  | -0.042602 |
| 8 | 0 | 0.206488  | -1.265358 | 0.174382  |
| 6 | 0 | 1.420092  | 0.774257  | 0.209117  |
| 8 | 0 | 0.537646  | 1.501446  | 1.051200  |
| 6 | 0 | 2.809130  | 1.349291  | 0.430774  |
| 8 | 0 | 6.078081  | -1.633710 | -0.238221 |
| 8 | 0 | 2.888705  | 2.700447  | -0.019977 |
| 1 | 0 | 3.973846  | -1.010506 | 1.152389  |
| 1 | 0 | 1.640479  | -0.864825 | 1.613125  |
| 1 | 0 | 3.645225  | 0.633772  | -1.402601 |
| 1 | 0 | 4.474759  | -2.840348 | -0.514425 |
| 1 | 0 | 4.644440  | -1.593853 | -1.762789 |
| 1 | 0 | 5.158032  | 1.992904  | -0.176169 |
| 1 | 0 | 0.190492  | -2.206731 | 0.406773  |
| 1 | 0 | 1.143324  | 0.877074  | -0.846744 |
| 1 | 0 | -0.319336 | 1.625356  | 0.590674  |
| 1 | 0 | 3.039276  | 1.301008  | 1.504174  |
| 1 | 0 | 6.277005  | -0.685041 | -0.272541 |
| 1 | 0 | 2.162183  | 3.175000  | 0.414208  |
| 6 | 0 | -5.077850 | 0.237945  | -0.214634 |
| 6 | 0 | -4.213372 | 1.284948  | -0.309936 |
| 6 | 0 | -2.795314 | 0.999888  | -0.187236 |
| 7 | 0 | -2.469981 | -0.342275 | -0.089613 |
| 6 | 0 | -3.337887 | -1.409598 | 0.068253  |
| 7 | 0 | -4.677895 | -1.074155 | -0.072198 |
| 8 | 0 | -2.950899 | -2.561708 | 0.281133  |
| 8 | 0 | -1.903922 | 1.872835  | -0.200454 |
| 6 | 0 | -4.651006 | 2.708688  | -0.463160 |
| 6 | 0 | -5.653069 | -2.148636 | 0.114230  |
| 1 | 0 | -6.149349 | 0.382103  | -0.279273 |
| 1 | 0 | -1.479565 | -0.582266 | 0.026644  |
| 1 | 0 | -4.198287 | 3.152368  | -1.349794 |
| 1 | 0 | -4.332822 | 3.302415  | 0.393763  |
| 1 | 0 | -5.735127 | 2.770325  | -0.552711 |
| 1 | 0 | -5.751805 | -2.402909 | 1.168999  |
| 1 | 0 | -5.315257 | -3.025838 | -0.429222 |
| 1 | 0 | -6.608496 | -1.811578 | -0.278149 |

---

**19. Glucose-Uracil**

---

| Atomic<br>Number | Atomic<br>Type | Coordinates (Angstroms) |           |           |
|------------------|----------------|-------------------------|-----------|-----------|
|                  |                | X                       | Y         | Z         |
| 8                | 0              | 2.117653                | -1.372042 | -0.244317 |
| 6                | 0              | 3.463211                | -0.993991 | 0.094404  |
| 6                | 0              | 1.146403                | -0.625918 | 0.485473  |
| 6                | 0              | 3.659662                | 0.458951  | -0.324647 |



|   |   |           |           |           |
|---|---|-----------|-----------|-----------|
| 6 | 0 | 4.390381  | -1.958156 | -0.633225 |
| 8 | 0 | 5.001434  | 0.843717  | -0.006234 |
| 8 | 0 | -0.117137 | -1.093101 | 0.086509  |
| 6 | 0 | 1.237191  | 0.853960  | 0.135211  |
| 8 | 0 | 0.381302  | 1.649264  | 0.943617  |
| 6 | 0 | 2.655860  | 1.333366  | 0.392379  |
| 8 | 0 | 5.723680  | -1.881831 | -0.141689 |
| 8 | 0 | 2.844725  | 2.668968  | -0.071657 |
| 1 | 0 | 3.628843  | -1.092944 | 1.176032  |
| 1 | 0 | 1.300144  | -0.777040 | 1.563982  |
| 1 | 0 | 3.492013  | 0.535266  | -1.406627 |
| 1 | 0 | 4.047983  | -2.976058 | -0.453704 |
| 1 | 0 | 4.342954  | -1.761545 | -1.710272 |
| 1 | 0 | 5.061188  | 1.800962  | -0.151158 |
| 1 | 0 | -0.202097 | -2.029590 | 0.324995  |
| 1 | 0 | 0.997960  | 0.961845  | -0.929040 |
| 1 | 0 | -0.445930 | 1.838646  | 0.451528  |
| 1 | 0 | 2.850605  | 1.283593  | 1.472669  |
| 1 | 0 | 5.990636  | -0.950218 | -0.181248 |
| 1 | 0 | 2.145064  | 3.201679  | 0.338374  |
| 6 | 0 | -2.947357 | 1.346010  | -0.265199 |
| 6 | 0 | -4.340066 | 1.652543  | -0.505361 |
| 6 | 0 | -5.265129 | 0.663274  | -0.403283 |
| 7 | 0 | -4.947496 | -0.621985 | -0.031762 |
| 6 | 0 | -3.625709 | -1.002687 | 0.187248  |
| 7 | 0 | -2.715130 | 0.038516  | 0.142288  |
| 8 | 0 | -3.302027 | -2.167064 | 0.430606  |
| 8 | 0 | -2.005628 | 2.153314  | -0.375662 |
| 6 | 0 | -5.951123 | -1.686651 | -0.010085 |
| 1 | 0 | -4.614703 | 2.652221  | -0.802045 |
| 1 | 0 | -6.316305 | 0.842060  | -0.586540 |
| 1 | 0 | -1.737249 | -0.259496 | 0.232388  |
| 1 | 0 | -5.820355 | -2.279120 | 0.890713  |
| 1 | 0 | -5.840090 | -2.335360 | -0.877497 |
| 1 | 0 | -6.934228 | -1.224625 | -0.013101 |

**20. Glucose-Methanol**

| Atomic<br>Number | Atomic<br>Type | Coordinates (Angstroms) |           |           |
|------------------|----------------|-------------------------|-----------|-----------|
|                  |                | X                       | Y         | Z         |
| 8                | 0              | -1.691708               | 1.388547  | -0.002090 |
| 6                | 0              | -1.899164               | 0.008835  | 0.352336  |
| 6                | 0              | -0.370649               | 1.804887  | 0.318552  |
| 6                | 0              | -0.964939               | -0.831158 | -0.508074 |
| 6                | 0              | -3.370718               | -0.299494 | 0.112804  |
| 8                | 0              | -1.168730               | -2.210821 | -0.197671 |
| 8                | 0              | -0.228048               | 3.157469  | -0.018394 |
| 6                | 0              | 0.658029                | 1.042470  | -0.504182 |

|   |   |           |           |           |
|---|---|-----------|-----------|-----------|
| 8 | 0 | 1.978345  | 1.430847  | -0.093914 |
| 6 | 0 | 0.489970  | -0.452154 | -0.282889 |
| 8 | 0 | -3.753844 | -1.531324 | 0.712723  |
| 8 | 0 | 1.241974  | -1.250150 | -1.186532 |
| 1 | 0 | -1.674630 | -0.149837 | 1.416211  |
| 1 | 0 | -0.192162 | 1.641756  | 1.392921  |
| 1 | 0 | -1.209357 | -0.642560 | -1.561742 |
| 1 | 0 | -3.972860 | 0.477687  | 0.580884  |
| 1 | 0 | -3.571449 | -0.292156 | -0.964371 |
| 1 | 0 | -0.466214 | -2.693141 | -0.664078 |
| 1 | 0 | -0.853453 | 3.672593  | 0.511346  |
| 1 | 0 | 0.500676  | 1.278696  | -1.561585 |
| 1 | 0 | 2.049187  | 2.387388  | -0.237106 |
| 1 | 0 | 0.758140  | -0.689256 | 0.756626  |
| 1 | 0 | -3.146385 | -2.211558 | 0.382309  |
| 1 | 0 | 2.179580  | -1.242060 | -0.896404 |
| 6 | 0 | 4.183088  | -1.208911 | 1.147045  |
| 8 | 0 | 3.736687  | -0.742394 | -0.130060 |
| 1 | 0 | 4.473007  | -2.247330 | 1.016381  |
| 1 | 0 | 3.388439  | -1.149469 | 1.893764  |
| 1 | 0 | 5.046388  | -0.638827 | 1.492182  |
| 1 | 0 | 3.419981  | 0.173829  | -0.043383 |

### 21. Maltose-Deoxyribose

| Atomic<br>Number | Atomic<br>Type | Coordinates (Angstroms) |           |           |
|------------------|----------------|-------------------------|-----------|-----------|
|                  |                | X                       | Y         | Z         |
| 8                | 0              | -4.387334               | 0.555740  | -0.566998 |
| 6                | 0              | -5.507251               | 0.366358  | 0.318302  |
| 6                | 0              | -3.285347               | -0.315037 | -0.305713 |
| 6                | 0              | -6.043340               | -1.056786 | 0.104847  |
| 6                | 0              | -6.535920               | 1.458870  | 0.002726  |
| 8                | 0              | -7.160380               | -1.256689 | 0.970993  |
| 8                | 0              | -2.314598               | -0.017880 | -1.272683 |
| 6                | 0              | -3.713805               | -1.780559 | -0.474611 |
| 8                | 0              | -2.700731               | -2.678291 | -0.054435 |
| 6                | 0              | -4.942608               | -2.072325 | 0.382437  |
| 8                | 0              | -7.535921               | 1.548332  | 1.003736  |
| 8                | 0              | -5.481317               | -3.365813 | 0.122754  |
| 8                | 0              | 0.254293                | 2.393296  | -0.112491 |
| 6                | 0              | -1.100400               | 1.940642  | -0.287288 |
| 6                | 0              | 1.020254                | 1.603618  | 0.784482  |
| 6                | 0              | -1.040666               | 0.528001  | -0.909731 |
| 6                | 0              | -1.816968               | 2.983123  | -1.165204 |
| 8                | 0              | 2.290777                | 2.201901  | 0.878540  |
| 6                | 0              | 1.173050                | 0.180479  | 0.234722  |
| 8                | 0              | 1.817654                | -0.712293 | 1.123485  |

|   |   |           |           |           |
|---|---|-----------|-----------|-----------|
| 6 | 0 | -0.217639 | -0.406818 | -0.022652 |
| 8 | 0 | -3.184782 | 3.134286  | -0.840418 |
| 8 | 0 | -0.103218 | -1.680561 | -0.657024 |
| 1 | 0 | -5.183019 | 0.487231  | 1.363457  |
| 1 | 0 | -2.916853 | -0.142879 | 0.717700  |
| 1 | 0 | -6.362267 | -1.153886 | -0.943843 |
| 1 | 0 | -6.027955 | 2.426726  | -0.022658 |
| 1 | 0 | -6.970783 | 1.275883  | -0.992053 |
| 1 | 0 | -7.402774 | -2.193530 | 0.926999  |
| 1 | 0 | -3.961517 | -1.928457 | -1.535966 |
| 1 | 0 | -1.856798 | -2.467786 | -0.500492 |
| 1 | 0 | -4.655008 | -1.999102 | 1.443356  |
| 1 | 0 | -7.910069 | 0.662644  | 1.133455  |
| 1 | 0 | -4.772216 | -4.013316 | 0.245464  |
| 1 | 0 | -1.604787 | 1.920818  | 0.691940  |
| 1 | 0 | 0.531033  | 1.583227  | 1.773302  |
| 1 | 0 | -0.532128 | 0.615346  | -1.875545 |
| 1 | 0 | -1.343070 | 3.949824  | -0.975828 |
| 1 | 0 | -1.677512 | 2.738563  | -2.228441 |
| 1 | 0 | 2.173378  | 3.124492  | 1.146986  |
| 1 | 0 | 1.714499  | 0.253163  | -0.720285 |
| 1 | 0 | 2.781882  | -0.532723 | 1.120122  |
| 1 | 0 | -0.710055 | -0.535848 | 0.954086  |
| 1 | 0 | -3.650177 | 2.289369  | -0.971878 |
| 1 | 0 | 0.565268  | -2.173623 | -0.153861 |
| 8 | 0 | 7.189970  | -0.883841 | -2.039197 |
| 6 | 0 | 6.416318  | -1.781956 | -1.258348 |
| 6 | 0 | 6.000868  | -1.231817 | 0.108720  |
| 8 | 0 | 7.109815  | -1.187963 | 1.034618  |
| 6 | 0 | 7.725242  | 0.079374  | 0.995808  |
| 6 | 0 | 5.462158  | 0.207504  | 0.068600  |
| 6 | 0 | 6.678623  | 1.072156  | 0.462434  |
| 8 | 0 | 4.396384  | 0.305722  | 1.026362  |
| 8 | 0 | 8.844038  | 0.091622  | 0.100946  |
| 1 | 0 | 7.986189  | -0.637337 | -1.535578 |
| 1 | 0 | 6.942497  | -2.734853 | -1.100475 |
| 1 | 0 | 5.511853  | -1.990402 | -1.840945 |
| 1 | 0 | 5.261645  | -1.907231 | 0.551712  |
| 1 | 0 | 8.079556  | 0.290023  | 2.009307  |
| 1 | 0 | 5.091410  | 0.464636  | -0.929122 |
| 1 | 0 | 7.087174  | 1.611680  | -0.394785 |
| 1 | 0 | 6.397827  | 1.797045  | 1.230794  |
| 1 | 0 | 3.971122  | 1.179632  | 0.967662  |
| 1 | 0 | 9.529035  | -0.488836 | 0.462716  |

---

**22. Maltose-Ribose**

---

| Atomic<br>Number | Atomic<br>Type | Coordinates (Angstroms) |           |           |
|------------------|----------------|-------------------------|-----------|-----------|
|                  |                | X                       | Y         | Z         |
| 8                | 0              | 4.445007                | -0.567184 | -0.011594 |
| 6                | 0              | 5.100156                | 0.263098  | 0.971121  |
| 6                | 0              | 3.268609                | 0.050008  | -0.539033 |
| 6                | 0              | 5.593083                | 1.514572  | 0.252104  |
| 6                | 0              | 6.222940                | -0.566412 | 1.581901  |
| 8                | 0              | 6.268388                | 2.343635  | 1.201744  |
| 8                | 0              | 2.728566                | -0.872434 | -1.451462 |
| 6                | 0              | 3.646817                | 1.320287  | -1.288517 |
| 8                | 0              | 2.498258                | 2.043495  | -1.708834 |
| 6                | 0              | 4.422040                | 2.245009  | -0.369990 |
| 8                | 0              | 6.738466                | 0.042264  | 2.759366  |
| 8                | 0              | 4.954748                | 3.368678  | -1.071470 |
| 8                | 0              | -0.015129               | -2.798116 | 0.124546  |
| 6                | 0              | 1.309020                | -2.227066 | 0.090384  |
| 6                | 0              | -1.024973               | -1.798587 | 0.209471  |
| 6                | 0              | 1.417830                | -1.404421 | -1.201201 |
| 6                | 0              | 2.302559                | -3.389198 | 0.158114  |
| 8                | 0              | -2.264268               | -2.452279 | 0.313740  |
| 6                | 0              | -1.031898               | -0.976130 | -1.067289 |
| 8                | 0              | -1.966039               | 0.094255  | -1.037888 |
| 6                | 0              | 0.334891                | -0.339989 | -1.252439 |
| 8                | 0              | 3.480344                | -3.054317 | 0.876264  |
| 8                | 0              | 0.405558                | 0.324584  | -2.517588 |
| 1                | 0              | 4.391902                | 0.537256  | 1.764673  |
| 1                | 0              | 2.572150                | 0.278268  | 0.280517  |
| 1                | 0              | 6.285170                | 1.207096  | -0.542287 |
| 1                | 0              | 5.825305                | -1.535338 | 1.881225  |
| 1                | 0              | 7.004658                | -0.726432 | 0.830431  |
| 1                | 0              | 6.459071                | 3.184018  | 0.756082  |
| 1                | 0              | 4.273956                | 1.026787  | -2.139141 |
| 1                | 0              | 1.930143                | 1.461797  | -2.252253 |
| 1                | 0              | 3.753380                | 2.587941  | 0.431644  |
| 1                | 0              | 6.996025                | 0.947794  | 2.526563  |
| 1                | 0              | 4.212200                | 3.807152  | -1.514484 |
| 1                | 0              | 1.455462                | -1.599653 | 0.980991  |
| 1                | 0              | -0.838406               | -1.162467 | 1.089018  |
| 1                | 0              | 1.266445                | -2.085548 | -2.042822 |
| 1                | 0              | 1.825445                | -4.198597 | 0.709005  |
| 1                | 0              | 2.533420                | -3.742655 | -0.852509 |
| 1                | 0              | -2.184315               | -3.114792 | 1.018673  |
| 1                | 0              | -1.233537               | -1.661742 | -1.898837 |
| 1                | 0              | -2.860770               | -0.251777 | -1.235774 |
| 1                | 0              | 0.477926                | 0.395184  | -0.448125 |
| 1                | 0              | 3.935325                | -2.328399 | 0.413361  |

|   |   |           |           |           |
|---|---|-----------|-----------|-----------|
| 1 | 0 | -0.409077 | 0.853258  | -2.576698 |
| 8 | 0 | -5.907333 | 3.149329  | 0.726430  |
| 6 | 0 | -5.869228 | 2.454409  | 1.971494  |
| 6 | 0 | -5.861515 | 0.950940  | 1.774739  |
| 8 | 0 | -7.080628 | 0.610002  | 1.053501  |
| 6 | 0 | -6.745769 | -0.163440 | -0.098189 |
| 6 | 0 | -4.698824 | 0.400865  | 0.940149  |
| 6 | 0 | -5.332999 | 0.270865  | -0.436754 |
| 8 | 0 | -4.620987 | -0.665584 | -1.251659 |
| 8 | 0 | -4.374941 | -0.873375 | 1.486544  |
| 8 | 0 | -7.588638 | 0.160324  | -1.174413 |
| 1 | 0 | -6.753600 | 2.919994  | 0.313292  |
| 1 | 0 | -6.724969 | 2.725694  | 2.596909  |
| 1 | 0 | -4.955747 | 2.770063  | 2.476078  |
| 1 | 0 | -5.864556 | 0.441626  | 2.742400  |
| 1 | 0 | -6.797875 | -1.231616 | 0.137362  |
| 1 | 0 | -3.833533 | 1.069428  | 0.937924  |
| 1 | 0 | -5.380730 | 1.251082  | -0.917897 |
| 1 | 0 | -5.103065 | -0.754850 | -2.087884 |
| 1 | 0 | -3.719761 | -1.313488 | 0.913922  |
| 1 | 0 | -8.465421 | -0.212172 | -1.005576 |

### 23. Maltose-Glucose

| Atomic<br>Number | Atomic<br>Type | Coordinates (Angstroms) |           |           |
|------------------|----------------|-------------------------|-----------|-----------|
|                  |                | X                       | Y         | Z         |
| 8                | 0              | -3.710014               | -0.671408 | 0.079785  |
| 6                | 0              | -3.675202               | -1.772932 | 1.007263  |
| 6                | 0              | -2.445237               | -0.390749 | -0.517183 |
| 6                | 0              | -3.283719               | -3.040145 | 0.230615  |
| 6                | 0              | -5.055508               | -1.866468 | 1.668529  |
| 8                | 0              | -3.237811               | -4.134404 | 1.144246  |
| 8                | 0              | -2.624493               | 0.687900  | -1.390136 |
| 6                | 0              | -1.982197               | -1.600239 | -1.341929 |
| 8                | 0              | -0.680306               | -1.392840 | -1.877048 |
| 6                | 0              | -1.937544               | -2.844520 | -0.461370 |
| 8                | 0              | -5.038053               | -2.707089 | 2.809741  |
| 8                | 0              | -1.672764               | -4.029665 | -1.205331 |
| 8                | 0              | -2.087164               | 4.018397  | 0.143986  |
| 6                | 0              | -2.669979               | 2.706261  | 0.083940  |
| 6                | 0              | -0.692055               | 3.991081  | 0.401788  |
| 6                | 0              | -2.038905               | 1.971733  | -1.119308 |
| 6                | 0              | -4.195736               | 2.884896  | -0.025102 |
| 8                | 0              | -0.215235               | 5.300959  | 0.484065  |
| 6                | 0              | 0.043790                | 3.319720  | -0.758352 |
| 8                | 0              | 1.442570                | 3.201179  | -0.478710 |
| 6                | 0              | -0.508478               | 1.914824  | -1.003629 |

---

|   |   |           |           |           |
|---|---|-----------|-----------|-----------|
| 8 | 0 | -4.922151 | 1.878788  | 0.654608  |
| 8 | 0 | 0.021807  | 1.353009  | -2.198251 |
| 1 | 0 | -2.928846 | -1.576836 | 1.792610  |
| 1 | 0 | -1.713807 | -0.164586 | 0.274313  |
| 1 | 0 | -4.049558 | -3.226232 | -0.537553 |
| 1 | 0 | -5.349162 | -0.871432 | 2.013320  |
| 1 | 0 | -5.796082 | -2.202044 | 0.926237  |
| 1 | 0 | -2.874388 | -4.897705 | 0.671103  |
| 1 | 0 | -2.709120 | -1.746694 | -2.152689 |
| 1 | 0 | -0.657987 | -0.517270 | -2.314518 |
| 1 | 0 | -1.161283 | -2.709423 | 0.308695  |
| 1 | 0 | -4.658934 | -3.560935 | 2.548632  |
| 1 | 0 | -0.810691 | -3.934507 | -1.634778 |
| 1 | 0 | -2.460573 | 2.172381  | 1.025284  |
| 1 | 0 | -0.508223 | 3.441806  | 1.342724  |
| 1 | 0 | -2.288391 | 2.543413  | -2.019297 |
| 1 | 0 | -4.448765 | 3.831844  | 0.458344  |
| 1 | 0 | -4.492072 | 2.952211  | -1.082169 |
| 1 | 0 | -0.623907 | 5.745362  | 1.239905  |
| 1 | 0 | -0.107354 | 3.931415  | -1.657037 |
| 1 | 0 | 1.795880  | 4.092487  | -0.342022 |
| 1 | 0 | -0.215906 | 1.288945  | -0.148022 |
| 1 | 0 | -4.688857 | 1.006704  | 0.293494  |
| 1 | 0 | 0.923651  | 1.046172  | -1.989954 |
| 8 | 0 | 5.650653  | -1.147024 | 0.320844  |
| 6 | 0 | 4.994446  | -0.088878 | 1.029376  |
| 6 | 0 | 4.834140  | -2.301515 | 0.188666  |
| 6 | 0 | 3.766242  | 0.373294  | 0.222256  |
| 6 | 0 | 6.022434  | 1.026301  | 1.246974  |
| 8 | 0 | 3.115892  | 1.396075  | 0.972368  |
| 8 | 0 | 5.553486  | -3.292529 | -0.484945 |
| 6 | 0 | 3.602030  | -1.982503 | -0.659234 |
| 8 | 0 | 2.707464  | -3.090294 | -0.723646 |
| 6 | 0 | 2.833526  | -0.809726 | -0.052263 |
| 8 | 0 | 5.584660  | 1.975513  | 2.206153  |
| 8 | 0 | 1.797384  | -0.366404 | -0.924358 |
| 1 | 0 | 4.661783  | -0.446885 | 2.017368  |
| 1 | 0 | 4.529661  | -2.646183 | 1.192966  |
| 1 | 0 | 4.117570  | 0.772884  | -0.740925 |
| 1 | 0 | 6.943972  | 0.580690  | 1.631492  |
| 1 | 0 | 6.255155  | 1.503318  | 0.282041  |
| 1 | 0 | 2.484729  | 1.883163  | 0.409423  |
| 1 | 0 | 6.327818  | -3.536716 | 0.040752  |
| 1 | 0 | 3.952799  | -1.707684 | -1.664053 |
| 1 | 0 | 3.185062  | -3.834283 | -1.116977 |
| 1 | 0 | 2.394310  | -1.132354 | 0.903964  |

|   |   |          |           |           |
|---|---|----------|-----------|-----------|
| 1 | 0 | 4.669939 | 2.210302  | 1.978317  |
| 1 | 0 | 1.141927 | -1.075226 | -1.064201 |

---

**24. Sucrose-Deoxyribose**

---

| Atomic<br>Number | Atomic<br>Type | Coordinates (Angstroms) |           |           |
|------------------|----------------|-------------------------|-----------|-----------|
|                  |                | X                       | Y         | Z         |
| 8                | 0              | -5.099934               | 0.219921  | 1.063004  |
| 6                | 0              | -6.092689               | -0.716557 | 0.589542  |
| 6                | 0              | -4.102685               | 0.474806  | 0.094244  |
| 6                | 0              | -6.042848               | -0.606876 | -0.943691 |
| 6                | 0              | -5.793804               | -2.104132 | 1.158839  |
| 6                | 0              | -4.558558               | -0.273660 | -1.208572 |
| 8                | 0              | -6.904147               | 0.393904  | -1.458505 |
| 6                | 0              | -4.031177               | 2.009412  | -0.057951 |
| 8                | 0              | -3.761153               | -1.451095 | -1.377392 |
| 8                | 0              | -5.322075               | 2.547135  | -0.357970 |
| 8                | 0              | -1.168710               | 1.458281  | 0.654259  |
| 6                | 0              | 0.115940                | 1.866004  | 0.162093  |
| 6                | 0              | -1.667094               | 0.282967  | 0.030702  |
| 6                | 0              | 1.160251                | 0.775109  | 0.470962  |
| 6                | 0              | 0.448017                | 3.212935  | 0.815602  |
| 8                | 0              | 2.411683                | 1.224305  | -0.037408 |
| 8                | 0              | -2.891903               | -0.050952 | 0.628155  |
| 6                | 0              | -0.716721               | -0.889527 | 0.284295  |
| 8                | 0              | -1.098157               | -2.064042 | -0.419875 |
| 6                | 0              | 0.701246                | -0.538940 | -0.163569 |
| 8                | 0              | 1.514275                | 3.875249  | 0.158480  |
| 8                | 0              | 1.593850                | -1.605830 | 0.194955  |
| 8                | 0              | -6.850880               | -2.966104 | 0.732577  |
| 1                | 0              | -7.065697               | -0.377080 | 0.956010  |
| 1                | 0              | -6.336739               | -1.546525 | -1.417706 |
| 1                | 0              | -5.756395               | -2.023893 | 2.253094  |
| 1                | 0              | -4.819777               | -2.460857 | 0.802407  |
| 1                | 0              | -4.465164               | 0.371672  | -2.089262 |
| 1                | 0              | -6.535482               | 1.267281  | -1.228971 |
| 1                | 0              | -3.372205               | 2.300788  | -0.878425 |
| 1                | 0              | -3.635563               | 2.427484  | 0.871089  |
| 1                | 0              | -3.999501               | -1.860728 | -2.219650 |
| 1                | 0              | -5.825678               | 2.545026  | 0.468648  |
| 1                | 0              | 0.069600                | 2.018478  | -0.928713 |
| 1                | 0              | -1.781997               | 0.456125  | -1.052662 |
| 1                | 0              | 1.215241                | 0.646568  | 1.562200  |
| 1                | 0              | -0.429007               | 3.862031  | 0.740380  |
| 1                | 0              | 0.662621                | 3.057958  | 1.884559  |
| 1                | 0              | 3.131072                | 0.684222  | 0.356700  |
| 1                | 0              | -0.720361               | -1.075756 | 1.368423  |

|   |   |           |           |           |
|---|---|-----------|-----------|-----------|
| 1 | 0 | -2.064940 | -2.057729 | -0.532375 |
| 1 | 0 | 0.713130  | -0.421245 | -1.257200 |
| 1 | 0 | 2.236351  | 3.230418  | 0.069645  |
| 1 | 0 | 1.178795  | -2.434068 | -0.089732 |
| 1 | 0 | -6.731578 | -3.837281 | 1.129881  |
| 8 | 0 | 8.238054  | -1.650722 | 0.261318  |
| 6 | 0 | 7.784316  | -0.711853 | 1.225172  |
| 6 | 0 | 6.404506  | -0.117122 | 0.932588  |
| 8 | 0 | 6.439233  | 0.826502  | -0.164163 |
| 6 | 0 | 6.150646  | 0.167999  | -1.378590 |
| 6 | 0 | 5.340237  | -1.144266 | 0.519882  |
| 6 | 0 | 5.378083  | -1.113960 | -1.022856 |
| 8 | 0 | 4.085306  | -0.699335 | 1.053963  |
| 8 | 0 | 7.349951  | -0.211751 | -2.064529 |
| 1 | 0 | 8.256068  | -1.218014 | -0.610891 |
| 1 | 0 | 8.496960  | 0.117648  | 1.344166  |
| 1 | 0 | 7.735908  | -1.251983 | 2.177330  |
| 1 | 0 | 6.070173  | 0.445362  | 1.810132  |
| 1 | 0 | 5.596766  | 0.878396  | -1.999461 |
| 1 | 0 | 5.571305  | -2.139611 | 0.913181  |
| 1 | 0 | 5.905272  | -1.981550 | -1.425711 |
| 1 | 0 | 4.366847  | -1.098472 | -1.436893 |
| 1 | 0 | 3.371369  | -1.317164 | 0.805043  |
| 1 | 0 | 7.813463  | 0.594735  | -2.332342 |

### 25. Sucrose-Fructose

| Atomic<br>Number | Atomic<br>Type | Coordinates (Angstroms) |           |           |
|------------------|----------------|-------------------------|-----------|-----------|
|                  |                | X                       | Y         | Z         |
| 8                | 0              | -5.419166               | -0.121428 | 1.298407  |
| 6                | 0              | -6.348231               | -1.124627 | 0.830134  |
| 6                | 0              | -4.578322               | 0.348964  | 0.265555  |
| 6                | 0              | -6.486844               | -0.863308 | -0.679316 |
| 6                | 0              | -5.830995               | -2.512656 | 1.210586  |
| 6                | 0              | -5.087774               | -0.329196 | -1.055692 |
| 8                | 0              | -7.505228               | 0.069943  | -0.993060 |
| 6                | 0              | -4.701970               | 1.887850  | 0.272107  |
| 8                | 0              | -4.187382               | -1.382286 | -1.420010 |
| 8                | 0              | -6.071189               | 2.285900  | 0.168523  |
| 8                | 0              | -1.722789               | 1.637961  | 0.589432  |
| 6                | 0              | -0.562920               | 2.238314  | -0.002493 |
| 6                | 0              | -2.163044               | 0.464458  | -0.082502 |
| 6                | 0              | 0.625370                | 1.259514  | 0.083291  |
| 6                | 0              | -0.305060               | 3.558002  | 0.735371  |
| 8                | 0              | 1.749089                | 1.897250  | -0.517319 |
| 8                | 0              | -3.258926               | -0.062629 | 0.614391  |
| 6                | 0              | -1.063641               | -0.600042 | -0.049442 |



---

|   |   |           |           |           |
|---|---|-----------|-----------|-----------|
| 8 | 0 | -1.389584 | -1.752172 | -0.814411 |
| 6 | 0 | 0.237806  | -0.041809 | -0.620402 |
| 8 | 0 | 0.575881  | 4.406276  | 0.020189  |
| 8 | 0 | 1.279990  | -1.023942 | -0.474996 |
| 8 | 0 | -6.825061 | -3.453930 | 0.801672  |
| 1 | 0 | -7.304651 | -0.944867 | 1.329170  |
| 1 | 0 | -6.728131 | -1.782318 | -1.219182 |
| 1 | 0 | -5.677833 | -2.534843 | 2.297357  |
| 1 | 0 | -4.870449 | -2.708517 | 0.718726  |
| 1 | 0 | -5.164185 | 0.398059  | -1.871811 |
| 1 | 0 | -7.213968 | 0.955119  | -0.704405 |
| 1 | 0 | -4.180435 | 2.335368  | -0.576514 |
| 1 | 0 | -4.250313 | 2.262211  | 1.194300  |
| 1 | 0 | -4.480810 | -1.753428 | -2.262854 |
| 1 | 0 | -6.471349 | 2.148904  | 1.039176  |
| 1 | 0 | -0.757970 | 2.472457  | -1.061853 |
| 1 | 0 | -2.428034 | 0.709875  | -1.124717 |
| 1 | 0 | 0.826167  | 1.051100  | 1.144591  |
| 1 | 0 | -1.254273 | 4.091879  | 0.833223  |
| 1 | 0 | 0.067965  | 3.344744  | 1.749193  |
| 1 | 0 | 2.564162  | 1.414951  | -0.273364 |
| 1 | 0 | -0.913021 | -0.872140 | 1.005745  |
| 1 | 0 | -2.357924 | -1.852709 | -0.828161 |
| 1 | 0 | 0.100639  | 0.166780  | -1.691366 |
| 1 | 0 | 1.360239  | 3.880255  | -0.206458 |
| 1 | 0 | 0.912107  | -1.877391 | -0.751787 |
| 1 | 0 | -6.571177 | -4.335948 | 1.099447  |
| 8 | 0 | 5.827372  | 0.827167  | -0.443867 |
| 6 | 0 | 4.944770  | -0.210926 | -0.723342 |
| 6 | 0 | 6.324726  | 0.885006  | 0.909752  |
| 6 | 0 | 5.525279  | -1.607064 | -0.350727 |
| 6 | 0 | 4.525173  | -0.057895 | -2.194158 |
| 6 | 0 | 6.974505  | -0.433135 | 1.348325  |
| 8 | 0 | 7.348640  | -0.356856 | 2.716746  |
| 6 | 0 | 6.021871  | -1.615727 | 1.107636  |
| 8 | 0 | 5.631334  | -0.340632 | -3.053405 |
| 8 | 0 | 3.751292  | -0.002321 | 0.076559  |
| 8 | 0 | 6.642488  | -1.978311 | -1.139385 |
| 8 | 0 | 4.957864  | -1.602642 | 2.064608  |
| 1 | 0 | 7.056905  | 1.693549  | 0.912760  |
| 1 | 0 | 5.509995  | 1.157012  | 1.592574  |
| 1 | 0 | 4.713259  | -2.346390 | -0.454102 |
| 1 | 0 | 3.695008  | -0.748907 | -2.394299 |
| 1 | 0 | 4.176219  | 0.972217  | -2.327412 |
| 1 | 0 | 7.886902  | -0.598200 | 0.769758  |
| 1 | 0 | 6.568334  | -0.618228 | 3.232389  |

|   |   |          |           |           |
|---|---|----------|-----------|-----------|
| 1 | 0 | 6.562499 | -2.551640 | 1.274213  |
| 1 | 0 | 5.371479 | -0.213773 | -3.974095 |
| 1 | 0 | 3.026296 | -0.611659 | -0.185666 |
| 1 | 0 | 6.543066 | -1.605803 | -2.031907 |
| 1 | 0 | 4.302068 | -0.950846 | 1.766628  |

---

**26. Sucrose-Maltose**

---

| Atomic<br>Number | Atomic<br>Type | Coordinates (Angstroms) |           |           |
|------------------|----------------|-------------------------|-----------|-----------|
|                  |                | X                       | Y         | Z         |
| 8                | 0              | -1.334741               | 3.037220  | -1.284224 |
| 6                | 0              | -0.405505               | 3.921084  | -0.609514 |
| 6                | 0              | -2.430522               | 2.678997  | -0.473333 |
| 6                | 0              | -1.178998               | 4.492848  | 0.593591  |
| 6                | 0              | 0.874590                | 3.157363  | -0.262812 |
| 6                | 0              | -2.197958               | 3.375535  | 0.909624  |
| 8                | 0              | -1.823620               | 5.724220  | 0.325061  |
| 6                | 0              | -3.705499               | 3.141250  | -1.214010 |
| 8                | 0              | -1.670097               | 2.411257  | 1.834887  |
| 8                | 0              | -3.630559               | 4.528969  | -1.545278 |
| 8                | 0              | -4.327113               | 0.190737  | -0.984508 |
| 6                | 0              | -5.449419               | -0.625301 | -0.618667 |
| 6                | 0              | -3.499006               | 0.549890  | 0.111793  |
| 6                | 0              | -4.919336               | -1.956467 | -0.062123 |
| 6                | 0              | -6.319371               | -0.797317 | -1.869920 |
| 8                | 0              | -6.032179               | -2.780545 | 0.278544  |
| 8                | 0              | -2.391155               | 1.254781  | -0.375669 |
| 6                | 0              | -2.932439               | -0.699641 | 0.797009  |
| 8                | 0              | -2.237319               | -0.345873 | 1.997655  |
| 6                | 0              | -4.037162               | -1.690211 | 1.153313  |
| 8                | 0              | -7.610733               | -1.289948 | -1.557414 |
| 8                | 0              | -3.498766               | -2.955168 | 1.580475  |
| 8                | 0              | 1.782560                | 4.095270  | 0.289297  |
| 1                | 0              | -0.155606               | 4.730318  | -1.301897 |
| 1                | 0              | -0.504928               | 4.676570  | 1.434335  |
| 1                | 0              | 1.258200                | 2.709877  | -1.191000 |
| 1                | 0              | 0.648626                | 2.342785  | 0.440814  |
| 1                | 0              | -3.124820               | 3.803596  | 1.307503  |
| 1                | 0              | -2.538812               | 5.565717  | -0.319178 |
| 1                | 0              | -4.598161               | 3.017431  | -0.596590 |
| 1                | 0              | -3.814240               | 2.527450  | -2.111672 |
| 1                | 0              | -1.489964               | 2.864781  | 2.669623  |
| 1                | 0              | -3.039879               | 4.609251  | -2.307889 |
| 1                | 0              | -6.053169               | -0.120051 | 0.152466  |
| 1                | 0              | -4.080186               | 1.150569  | 0.833014  |
| 1                | 0              | -4.315513               | -2.440215 | -0.844356 |
| 1                | 0              | -6.457981               | 0.183073  | -2.333147 |

---

|   |   |           |           |           |
|---|---|-----------|-----------|-----------|
| 1 | 0 | -5.799341 | -1.443341 | -2.593347 |
| 1 | 0 | -5.691247 | -3.595792 | 0.674333  |
| 1 | 0 | -2.244170 | -1.170607 | 0.083769  |
| 1 | 0 | -1.900639 | 0.570832  | 1.906309  |
| 1 | 0 | -4.658575 | -1.274049 | 1.957877  |
| 1 | 0 | -7.503045 | -2.112892 | -1.055918 |
| 1 | 0 | -3.235361 | -2.893216 | 2.509026  |
| 1 | 0 | 2.676876  | 3.709240  | 0.341839  |
| 8 | 0 | 2.552238  | -3.170076 | -0.225528 |
| 6 | 0 | 1.211218  | -3.376914 | -0.705810 |
| 6 | 0 | 2.721305  | -1.964588 | 0.522242  |
| 6 | 0 | 0.246141  | -3.472734 | 0.494151  |
| 6 | 0 | 1.229292  | -4.641631 | -1.572687 |
| 8 | 0 | -1.075154 | -3.566625 | -0.035247 |
| 8 | 0 | 4.080777  | -1.851040 | 0.809960  |
| 6 | 0 | 1.885294  | -2.091822 | 1.796443  |
| 8 | 0 | 2.045166  | -0.922456 | 2.598558  |
| 6 | 0 | 0.418864  | -2.243960 | 1.389205  |
| 8 | 0 | 0.039899  | -4.784116 | -2.332001 |
| 8 | 0 | -0.390597 | -2.309456 | 2.561511  |
| 8 | 0 | 5.741268  | 0.510356  | -1.520193 |
| 6 | 0 | 4.910247  | -0.616852 | -1.211555 |
| 6 | 0 | 5.195641  | 1.770562  | -1.126836 |
| 6 | 0 | 4.813126  | -0.704929 | 0.326117  |
| 6 | 0 | 5.545434  | -1.850979 | -1.875605 |
| 8 | 0 | 6.070970  | 2.767869  | -1.535756 |
| 6 | 0 | 5.074906  | 1.814031  | 0.393981  |
| 8 | 0 | 4.422150  | 3.020785  | 0.792894  |
| 6 | 0 | 4.280727  | 0.611404  | 0.909098  |
| 8 | 0 | 4.592824  | -2.829095 | -2.253236 |
| 8 | 0 | 4.353742  | 0.659627  | 2.324031  |
| 1 | 0 | 0.908975  | -2.527186 | -1.337669 |
| 1 | 0 | 2.360317  | -1.114982 | -0.077607 |
| 1 | 0 | 0.487181  | -4.375312 | 1.076196  |
| 1 | 0 | 2.053768  | -4.567385 | -2.286698 |
| 1 | 0 | 1.409608  | -5.519295 | -0.932422 |
| 1 | 0 | -1.736249 | -3.547512 | 0.680044  |
| 1 | 0 | 2.232574  | -2.976045 | 2.346930  |
| 1 | 0 | 1.376657  | -0.977223 | 3.298890  |
| 1 | 0 | 0.135740  | -1.353777 | 0.808963  |
| 1 | 0 | -0.713603 | -4.659322 | -1.733633 |
| 1 | 0 | -1.059042 | -1.595390 | 2.491308  |
| 1 | 0 | 3.915545  | -0.469798 | -1.663759 |
| 1 | 0 | 4.201286  | 1.886825  | -1.597136 |
| 1 | 0 | 5.820365  | -0.875388 | 0.718089  |
| 1 | 0 | 6.028089  | -1.516280 | -2.797312 |

|   |   |          |           |           |
|---|---|----------|-----------|-----------|
| 1 | 0 | 6.320443 | -2.273713 | -1.219711 |
| 1 | 0 | 6.159943 | 2.725517  | -2.498159 |
| 1 | 0 | 6.092288 | 1.786293  | 0.805525  |
| 1 | 0 | 4.368794 | 2.991819  | 1.760851  |
| 1 | 0 | 3.236244 | 0.753278  | 0.588193  |
| 1 | 0 | 4.105491 | -3.136977 | -1.470711 |
| 1 | 0 | 3.651592 | 0.079270  | 2.671190  |

---
